# Supplementary material for: Ruthenium Half-Sandwich Type Complexes with Bidentate Monosaccharide Ligands Show Antineoplastic Activity in Ovarian Cancer Cell Models through Reactive Oxygen Species Production
Source: MDPI journal article supplement (doi:10.3390/ijms221910454), 2021-09-28
Supplement: s1 [file s1]

# SUPPORTING INFORMATION

## **Ruthenium half-sandwich type complexes with bidentate monosaccharide ligands show antineoplastic activity in ovarian cancer cell models through reactive oxygen species production**

István Kacsir<sup>#1,2</sup>, Adrienn Sipos<sup>#3</sup>, Gyula Ujlaki<sup>3</sup>, Péter Buglyó<sup>4</sup>, László Somsák<sup>1</sup>, Péter Bai<sup>\*3,5,6</sup>, Éva Bokor<sup>\*1</sup>

<sup>1</sup>Department of Organic Chemistry, University of Debrecen, PO Box 400, H-4002 Debrecen, Hungary;

<sup>2</sup>Doctoral School of Chemistry, University of Debrecen, PO Box 400, H-4002 Debrecen, Hungary;

<sup>3</sup>Department of Medical Chemistry, Faculty of Medicine, University of Debrecen, H-4032 Debrecen, Hungary;

<sup>4</sup>Department of Inorganic & Analytical Chemistry, Faculty of Sciences and Technology, University of Debrecen, H-4032 Debrecen, Hungary;

<sup>5</sup>NKFIH-DE Lendület Laboratory of Cellular Metabolism, H-4032 Debrecen, Hungary;

<sup>6</sup>Research Center for Molecular Medicine, Faculty of Medicine, University of Debrecen, H-4032 Debrecen, Hungary

<sup>#</sup>equal contribution

<sup>\*</sup>corresponding authors

Correspondence should be sent to:

Éva Bokor, PhD, University of Debrecen, Department of Organic Chemistry, , PO Box 400, H-4002 Debrecen, Hungary, Tel. +36 52 512 900 ext 22474; e-mail: bokor.eva@science.unideb.hu

Péter Bai, PhD, DSc University of Debrecen, Department of Medical Chemistry, H-4032 Debrecen, Egyetem tér 1., Hungary, Tel. +36 52 412 345; Fax. +36 52 412 566, e-mail: baip@med.unideb.hu

### **Table of contents:**

|                                                                                               |           |
|-----------------------------------------------------------------------------------------------|-----------|
| <b>1. Selected NMR data for the synthesized compounds.....</b>                                | <b>2</b>  |
| <b>2. Copies of <sup>1</sup>H and <sup>13</sup>C NMR spectra .....</b>                        | <b>7</b>  |
| <b>3. A representative example for the stability of the complexes in aqueous medium .....</b> | <b>37</b> |
| <b>4. Table S9. Distribution coefficient of the synthesized complexes (logD) .....</b>        | <b>38</b> |

## 1. Selected NMR data for the synthesized compounds

**Table S1.** Selected <sup>1</sup>H NMR data of **Ru-dimer**, the 1-(β-D-glucopyranosyl)-4-hetaryl-1,2,3-triazoles (**L-1–L-3**) and their half-sandwich Ru(II) complexes (**Ru-1–Ru-3**)

|                                        | Tria-H-5   | Py-H-6     | Py-H-4 or Qu-H-4 | H-1'       | H-2'       | <i>p</i> -cym-CH <sub>Ar</sub> | <i>i</i> -Pr-CH | C <sub>6</sub> H <sub>4</sub> -CH <sub>3</sub> | <i>i</i> -Pr-CH <sub>3</sub> |
|----------------------------------------|------------|------------|------------------|------------|------------|--------------------------------|-----------------|------------------------------------------------|------------------------------|
| <b>Ru-dimer</b> (CDCl <sub>3</sub> )   | -          | -          | -                | -          | -          | 5.48; 5.34                     | 2.93            | 2.16                                           | 1.28                         |
| <b>Ru-dimer</b> (CD <sub>3</sub> OD)   | -          | -          | -                | -          | -          | 5.88; 5.66                     | 3.31            | 2.20                                           | 1.30                         |
| <b>Ru-dimer</b> (DMSO-d <sub>6</sub> ) | -          | -          | -                | -          | -          | 5.81; 5.77                     | 2.82            | 2.08                                           | 1.18                         |
| <b>L-1a</b> (CDCl <sub>3</sub> )       | 8.42       | 8.61       | 7.78             | 5.94       | 5.51       | -                              | -               | -                                              | -                            |
| <b>L-1b</b> (CDCl <sub>3</sub> )       | 8.63       | -          | 8.24             | 5.99       | 5.59       | -                              | -               | -                                              | -                            |
| <b>L-2a</b> (CDCl <sub>3</sub> )       | 8.61       | 8.61       | 7.86-7.76*       | 6.34       | 6.07       | -                              | -               | -                                              | -                            |
| <b>L-3a</b> (CD <sub>3</sub> OD)       | 8.63       | 8.59       | 7.92             | 5.70       | 3.96       | -                              | -               | -                                              | -                            |
| <b>L-3b</b> (DMSO-d <sub>6</sub> )     | 8.99       | -          | 8.51             | 5.68       | 3.90       | -                              | -               | -                                              | -                            |
| <b>Ru-1a</b> (CDCl <sub>3</sub> )      | 8.92; 8.79 | 9.25; 9.22 | 7.96             | 6.00; 5.99 | 5.95-5.88* | 5.95-5.83,<br>5.73-5.67*       | 2.79; 2.74      | 2.22; 2.20                                     | 1.17-1.12*                   |
| <b>Ru-1b</b> (CDCl <sub>3</sub> )      | 9.03; 9.24 | -          | 8.39; 8.37       | 6.08; 6.11 | 6.03; 5.97 | 5.96-5.67*                     | 2.57; 2.53      | 2.07; 2.15                                     | 1.07, 1.04; 1.02, 1.00       |
| <b>Ru-2a</b> (CDCl <sub>3</sub> )      | 9.02; 8.98 | 9.23; 9.20 | 7.82-7.75*       | 6.50; 6.43 | 6.60; 6.10 | 5.81-5.44*                     | 2.50; 2.36      | 2.08; 2.00                                     | 0.94, 0.91; 0.79, 0.74       |
| <b>Ru-3a</b> (CD <sub>3</sub> OD)      | 9.22; 9.21 | 9.42       | 8.19             | 5.88; 5.88 | 3.95-3.89* | 6.12-6.05,<br>5.90-5.84*       | 2.79-2.71*      | 2.22                                           | 1.18-1.09*                   |
| <b>Ru-3b</b> (DMSO-d <sub>6</sub> )    | 9.42; 9.41 | -          | 8.70; 8.68       | 5.95; 5.93 | 4.00; 3.99 | 6.13-5.96*                     | 2.48; 2.46      | 2.20                                           | 1.00, 0.98; 0.92, 0.92       |

\*Overlapping signals.

**Table S2.** Changes of the chemical shifts of selected  $^1\text{H}$  NMR resonances as a result of the complex formation for **Ru-1–Ru-3** ( $\Delta = \delta_{\text{complex}} - \delta_{\text{ligand or Ru-dimer}}$ ).

| Triazolok                              | $\Delta(\text{Tria-H-5})$ | $\Delta(\text{Py-H-6})$ | $\Delta(\text{Py-H-4})$ or $\Delta(\text{Qu-H-4})$ | $\Delta(\text{H-1'})$ | $\Delta(\text{H-2'})$ | <i>i</i> -Pr-CH | $\text{C}_6\text{H}_4\text{-CH}_3$ | <i>i</i> -Pr-CH <sub>3</sub> |
|----------------------------------------|---------------------------|-------------------------|----------------------------------------------------|-----------------------|-----------------------|-----------------|------------------------------------|------------------------------|
| <b>Ru-1a</b><br>(CDCl <sub>3</sub> )   | +0.50<br>+0.37            | +0.64<br>+0.61          | +0.18                                              | +0.06<br>+0.05        | *                     | -0.14<br>-0.19  | +0.06<br>+0.04                     | *                            |
| <b>Ru-1b</b><br>(CDCl <sub>3</sub> )   | +0.40<br>+0.61            | -                       | +0.15<br>+0.13                                     | +0.09<br>+0.12        | +0.44<br>+0.38        | -0.36<br>-0.40  | -0.09<br>-0.01                     | -0.21, -0.24<br>-0.26, -0.28 |
| <b>Ru-2a</b><br>(CDCl <sub>3</sub> )   | +0.41<br>+0.37            | +0.62<br>+0.59          | *                                                  | +0.16<br>+0.09        | +0.53<br>+0.03        | -0.43<br>-0.57  | -0.08<br>-0.16                     | -0.34, -0.37<br>-0.49, -0.54 |
| <b>Ru-3a</b><br>(CD <sub>3</sub> OD)   | +0.59<br>+0.58            | +0.83                   | +0.27                                              | +0.18<br>+0.18        | *                     | *               | +0.02                              | *                            |
| <b>Ru-3b</b><br>(DMSO-d <sub>6</sub> ) | +0.43<br>+0.42            | -                       | +0.19<br>+0.17                                     | +0.27<br>+0.25        | +0.10<br>+0.09        | -0.34;<br>-0.36 | +0.12                              | -0.18, -0.20<br>-0.26, -0.26 |

\*Due to signal overlaps these resonances could not be assigned precisely.

**Table S3.** Selected  $^{13}\text{C}$  NMR data of **Ru-dimer**, the 1-( $\beta$ -D-glucopyranosyl)-4-hetaryl-1,2,3-triazoles (**L-1–L-3**) and their half-sandwich Ru(II) complexes (**Ru-1–Ru-3**)

|                                        | Tria-C-5        | Py-C-6          | Py-C-5       | Py-C-4 or<br>Qu-C-4 | Py-C-3 or<br>Qu-C-3 | C-1'       | C-2'       | <i>p</i> -cym-C <sub>qAr</sub> | <i>p</i> -cym-CH <sub>Ar</sub> | <i>i</i> -Pr-CH | C <sub>6</sub> H <sub>4</sub> -<br>CH <sub>3</sub> |
|----------------------------------------|-----------------|-----------------|--------------|---------------------|---------------------|------------|------------|--------------------------------|--------------------------------|-----------------|----------------------------------------------------|
| <b>Ru-dimer</b> (CDCl <sub>3</sub> )   | -               | -               | -            | -                   | -                   | -          | -          | 101.2; 96.8                    | 81.3; 80.5                     | 30.6            | 19.0                                               |
| <b>Ru-dimer</b> (CD <sub>3</sub> OD)   | -               | -               | -            | -                   | -                   | -          | -          | 102.7; 98.5                    | 80.4; 79.3                     | 32.6            | 18.9                                               |
| <b>Ru-dimer</b> (DMSO-d <sub>6</sub> ) | -               | -               | -            | -                   | -                   | -          | -          | 106.4; 100.1                   | 86.4; 85.5                     | 30.0            | 17.9                                               |
| <b>L-1a</b> (CDCl <sub>3</sub> )       | 120.7           | 149.7           | 123.3        | 137.0               | 120.5               | 86.0       | 70.7       | -                              | -                              | -               | -                                                  |
| <b>L-1b</b> (CDCl <sub>3</sub> )       | 121.4           | -               | -            | 137.0               | 118.7               | 86.0       | 70.7       | -                              | -                              | -               | -                                                  |
| <b>L-2a</b> (CDCl <sub>3</sub> )       | 121.0           | 149.6           | 123.3        | 137.1               | 120.6               | 86.4       | 71.3       | -                              | -                              | -               | -                                                  |
| <b>L-3a</b> (CD <sub>3</sub> OD)       | 123.4           | 150.5           | 124.6        | 138.9               | 121.7               | 89.8       | 74.1       | -                              | -                              | -               | -                                                  |
| <b>L-3b</b> (DMSO-d <sub>6</sub> )     | 123.3           | -               | -            | 137.3               | 118.3               | 87.8       | 72.2       | -                              | -                              | -               | -                                                  |
| <b>Ru-1a</b> (CDCl <sub>3</sub> )      | 125.4;<br>125.3 | 155.5;<br>155.4 | 127.1; 126.9 | 140.3; 140.2        | 122.9               | 86.8; 86.7 | 70.2; 69.8 | 106.3, 101.8;<br>105.5, 103.1  | 86.4-83.1*                     | 31.1; 31.0      | 18.7                                               |
| <b>Ru-1b</b> (CDCl <sub>3</sub> )      | 127.6;<br>127.5 | -               | -            | 141.0; 141.3        | 119.1; 118.8        | 88.1-84.0* | 70.2; 69.8 | 105.4, 102.7;<br>106.3, 102.1  | 88.1-84.0*                     | 31.1; 31.3      | 18.5;<br>18.7                                      |
| <b>Ru-2a</b> (CDCl <sub>3</sub> )      | 126.2;<br>123.8 | 155.7;<br>155.5 | 127.2; 126.9 | 140.1; 140.0        | 122.7               | 87.2; 86.7 | 71.7; 70.4 | 105.8, 102.6;<br>105.3, 103.9  | 86.4-82.5*                     | 31.0            | 18.8;<br>18.6                                      |
| <b>Ru-3a</b> (CD <sub>3</sub> OD)      | 125.5;<br>125.2 | 156.8           | 127.6        | 141.5               | 123.6               | 91.3; 91.2 | 74.5; 74.3 | 106.8, 103.8;<br>106.6, 104.1  | 87.3-84.6*                     | 32.3; 32.2      | 18.8;<br>18.7                                      |
| <b>Ru-3b</b> (DMSO-d <sub>6</sub> )    | 127.1;<br>126.9 | -               | -            | 142.6               | 119.5; 119.4        | 91.4; 91.2 | 74.4; 74.3 | 106.5, 104.7;<br>106.3, 104.9  | 88.6-84.3*                     | 32.3; 32.2      | 18.8;<br>18.7                                      |

\*Signals were not assigned precisely.

**Table S4.** Changes of the chemical shifts of selected  $^{13}\text{C}$  NMR resonances as a result of the complex formation for **Ru-1–Ru-3**

$$(\Delta = \delta_{\text{complex}} - \delta_{\text{ligand or Ru-dimer}})$$

|                                         | $\Delta(\text{Tria-C-5})$ | $\Delta(\text{Py-C-6})$ | $\Delta(\text{Py-C-5})$ | $\Delta(\text{Py-C-4})$ or<br>$\Delta(\text{Qu-C-4})$ | $\Delta(\text{Py-C-3})$ or<br>$\Delta(\text{Qu-C-3})$ | $\Delta(\text{C-1'})$ | $\Delta(\text{C-2'})$ | $\Delta(p\text{-cym-C}_{\text{qAr}})$ | $\Delta(i\text{-Pr-CH})$ | $\Delta(\text{C}_6\text{H}_4\text{-CH}_3)$ |
|-----------------------------------------|---------------------------|-------------------------|-------------------------|-------------------------------------------------------|-------------------------------------------------------|-----------------------|-----------------------|---------------------------------------|--------------------------|--------------------------------------------|
| <b>Ru-1a</b> ( $\text{CDCl}_3$ )        | +4.7<br>+4.6              | +5.8<br>+5.7            | +3.8<br>+3.6            | +3.3<br>+3.2                                          | +2.4                                                  | +0.8<br>+0.7          | -0.5<br>-0.9          | +5.1, +5.0<br>+4.3, +4.6              | +0.5<br>+0.4             | -0.3                                       |
| <b>Ru-1b</b> ( $\text{CDCl}_3$ )        | +6.2<br>+6.1              | -                       | -                       | +4.0<br>+4.3                                          | +0.4<br>+0.1                                          | *                     | -0.5<br>-0.9          | +4.2, +5.9<br>+5.1, +5.3              | +0.5<br>+0.7             | -0.5<br>-0.3                               |
| <b>Ru-2a</b> ( $\text{CDCl}_3$ )        | +5.2<br>+2.8              | +6.1<br>+5.9            | +3.9<br>+3.6            | +3.0<br>+2.9                                          | +2.1                                                  | +0.8<br>+0.3          | +0.4<br>+0.1          | +4.6, +5.8<br>+4.1, +7.1              | +0.4                     | -0.2<br>-0.4                               |
| <b>Ru-3a</b> ( $\text{CD}_3\text{OD}$ ) | +2.1<br>+1.8              | +6.3                    | +3.0                    | +2.6                                                  | +1.9                                                  | +1.5<br>+1.4          | +0.4<br>+0.2          | +4.1, +5.3<br>+3.9, +5.6              | -0.3<br>-0.4             | -0.1<br>-0.2                               |
| <b>Ru-3b</b> ( $\text{DMSO-d}_6$ )      | +3.8<br>+3.6              | -                       | -                       | +5.3                                                  | +1.2<br>+1.1                                          | +3.6<br>+3.4          | +0.2<br>+0.1          | +0.1; +4.6<br>-0.1; +4.8              | +2.3; +2.2               | +0.9<br>+0.8                               |

\*Due to uncertain signal assignment the data could not be calculated precisely.

**Table S5.** Selected <sup>1</sup>H NMR data of **Ru-dimer**, the monosaccharide-based 5-(pyridine-2-yl)-1,3,4-oxadiazoles (**L-4–L-12**) and their half-sandwich Ru(II) complexes (**Ru-4–Ru-12**)

|                                      | Py-H-6     | Py-H-5     | H-1'       | H-2'                | <i>p</i> -cym-CH <sub>Ar</sub> | <i>i</i> -Pr-CH | C <sub>6</sub> H <sub>4</sub> -CH <sub>3</sub> |
|--------------------------------------|------------|------------|------------|---------------------|--------------------------------|-----------------|------------------------------------------------|
| <b>Ru-dimer</b> (CDCl <sub>3</sub> ) | -          | -          | -          | -                   | 5.48; 5.34                     | 2.93            | 2.16                                           |
| <b>Ru-dimer</b> (CD <sub>3</sub> OD) | -          | -          | -          | -                   | 5.88; 5.66                     | 3.31            | 2.20                                           |
| <b>L-4</b> (CDCl <sub>3</sub> )      | 8.81       | 7.48       | 5.28       | 6.05                | -                              | -               | -                                              |
| <b>L-5</b> (CDCl <sub>3</sub> )      | 8.82       | 7.49       | 4.92       | 5.56                | -                              | -               | -                                              |
| <b>L-6</b> (CDCl <sub>3</sub> )      | 8.80       | 7.47       | 5.15       | 5.96                | -                              | -               | -                                              |
| <b>L-7</b> (CDCl <sub>3</sub> )      | 8.82       | 7.50       | 4.89       | 5.67                | -                              | -               | -                                              |
| <b>L-8</b> (CDCl <sub>3</sub> )      | 8.81       | 7.47       | 5.30       | 6.32                | -                              | -               | -                                              |
| <b>L-9</b> (CDCl <sub>3</sub> )      | 8.79       | 7.49       | 6.35       | 5.69                | -                              | -               | -                                              |
| <b>L-10</b> (CD <sub>3</sub> OD)     | 8.75       | 7.64       | 4.68       | 3.84                | -                              | -               | -                                              |
| <b>L-11</b> (CD <sub>3</sub> OD)     | 8.74       | 7.63       | 4.59       | 3.84                | -                              | -               | -                                              |
| <b>L-12</b> (CD <sub>3</sub> OD)     | 8.77       | 7.65       | 4.63       | 4.22                | -                              | -               | -                                              |
| <b>Ru-4</b> (CDCl <sub>3</sub> )     | 9.26; 9.50 | 7.77; 7.91 | 5.46; 5.35 | 6.16; 5.72          | 5.90-5.51*                     | 2.78; 2.72      | 1.95; 2.02                                     |
| <b>Ru-5</b> (CDCl <sub>3</sub> )     | 9.30; 9.45 | 7.80; 7.88 | 5.03; 5.00 | 5.75; 5.44          | 6.01-5.96,<br>5.82-5.69*       | 3.03; 2.91      | 2.23-2.02*                                     |
| <b>Ru-6</b> (CDCl <sub>3</sub> )     | 9.26; 9.46 | 7.77; 7.89 | 5.28; 5.24 | 6.11; 5.74          | 5.86-5.35*                     | 2.80; 2.75      | 1.99; 2.04                                     |
| <b>Ru-7</b> (CDCl <sub>3</sub> )     | 9.34; 9.46 | 7.80; 7.87 | 5.01; 4.98 | 5.85; 5.47          | 6.01-5.95,<br>5.82-5.71*       | 3.01; 2.89      | 2.24-2.04*                                     |
| <b>Ru-8</b> (CDCl <sub>3</sub> )     | 9.26; 9.49 | 7.80; 7.93 | 5.47; 5.37 | 6.43;<br>6.02-5.94* | 5.84-5.27*                     | 2.80; 2.73      | 1.94; 2.03                                     |
| <b>Ru-9</b> (CDCl <sub>3</sub> )     | 9.33       | 7.79       | 6.52; 6.46 | 5.84-5.71*          | 6.01-5.95,<br>5.84-5.71*       | 2.98; 2.97      | 2.29-2.08*                                     |
| <b>Ru-10</b> (CD <sub>3</sub> OD)    | 9.54       | 7.95; 7.94 | 4.85; 4.83 | 3.83; 3.81          | 6.19-6.13,<br>5.94-5.92*       | 2.91; 2.90      | 2.23                                           |
| <b>Ru-11</b> (CD <sub>3</sub> OD)    | 9.53       | 7.95-7.92* | 4.77; 4.76 | 3.81; 3.80          | 6.18-6.12,<br>5.94-5.90*       | 2.91            | 2.22                                           |
| <b>Ru-12</b> (CD <sub>3</sub> OD)    | 9.55       | 7.95; 7.94 | 4.78; 4.76 | 4.18; 4.15          | 6.19-6.13,<br>5.94-5.92*       | 2.91            | 2.23                                           |

\*Overlapping signals.

**Table S6.** Changes of the chemical shifts of selected <sup>1</sup>H NMR resonances as a result of the complex formation for **Ru-4–Ru-12** ( $\Delta = \delta_{\text{complex}} - \delta_{\text{ligand or Ru-dimer}}$ )

|                                   | $\Delta(\text{Py-H-6})$ | $\Delta(\text{Py-H-5})$ | $\Delta(\text{H-1}')$ | $\Delta(\text{H-2}')$ | $\Delta(\textit{i}\text{-Pr-CH})$ | $\Delta(\text{C}_6\text{H}_4\text{-CH}_3)$ |
|-----------------------------------|-------------------------|-------------------------|-----------------------|-----------------------|-----------------------------------|--------------------------------------------|
| <b>Ru-4</b> (CDCl <sub>3</sub> )  | +0.45<br>+0.69          | +0.29<br>+0.43          | +0.18<br>+0.07        | +0.11<br>-0.33        | -0.15<br>-0.21                    | -0.21<br>-0.14                             |
| <b>Ru-5</b> (CDCl <sub>3</sub> )  | +0.48<br>+0.63          | +0.31<br>+0.39          | +0.11<br>+0.08        | +0.19<br>-0.12        | +0.10<br>-0.02                    | *                                          |
| <b>Ru-6</b> (CDCl <sub>3</sub> )  | +0.46<br>+0.66          | +0.30<br>+0.42          | +0.13<br>+0.09        | +0.15<br>-0.22        | -0.13<br>-0.18                    | -0.17<br>-0.12                             |
| <b>Ru-7</b> (CDCl <sub>3</sub> )  | +0.52<br>+0.64          | +0.30<br>+0.37          | +0.12<br>+0.09        | +0.18<br>-0.20        | +0.08<br>-0.04                    | *                                          |
| <b>Ru-8</b> (CDCl <sub>3</sub> )  | +0.45<br>+0.68          | +0.33<br>+0.46          | +0.17<br>+0.07        | +0.11<br>*            | -0.13<br>-0.20                    | -0.22<br>-0.13                             |
| <b>Ru-9</b> (CDCl <sub>3</sub> )  | +0.54                   | +0.30                   | +0.17<br>+0.11        | *                     | +0.05<br>+0.04                    | *                                          |
| <b>Ru-10</b> (CD <sub>3</sub> OD) | +0.79                   | +0.31<br>+0.30          | +0.17<br>+0.15        | -0.01<br>-0.03        | -0.40<br>-0.41                    | +0.03                                      |
| <b>Ru-11</b> (CD <sub>3</sub> OD) | +0.79                   | *                       | +0.18<br>+0.17        | -0.03<br>-0.04        | -0.40                             | +0.02                                      |
| <b>Ru-12</b> (CD <sub>3</sub> OD) | +0.78                   | +0.30<br>+0.29          | +0.15<br>+0.13        | -0.04<br>-0.07        | -0.40                             | +0.03                                      |

\*Due to signal overlaps these resonances could not be assigned precisely.

| <b>Table S7.</b> Selected $^{13}\text{C}$ NMR data of <b>Ru-dimer</b> , the monosaccharide-based 5-(pyridine-2-yl)-1,3,4-oxadiazoles ( <b>L-4–L-12</b> ) and their half-sandwich Ru(II) complexes ( <b>Ru-4–Ru-12</b> ) |              |              |              |              |              |                                        |                                        |                 |                                    |
|-------------------------------------------------------------------------------------------------------------------------------------------------------------------------------------------------------------------------|--------------|--------------|--------------|--------------|--------------|----------------------------------------|----------------------------------------|-----------------|------------------------------------|
|                                                                                                                                                                                                                         | Py-C-6       | Py-C-5       | Py-C-4       | Py-C-3       | Py-C-2       | <i>p</i> -cym- $\text{C}_{\text{qAr}}$ | <i>p</i> -cym- $\text{CH}_{\text{Ar}}$ | <i>i</i> -Pr-CH | $\text{C}_6\text{H}_4\text{-CH}_3$ |
| <b>Ru-dimer</b> ( $\text{CDCl}_3$ )                                                                                                                                                                                     | -            | -            | -            | -            | -            | 101.2; 96.8                            | 81.3; 80.5                             | 30.6            | 19.0                               |
| <b>Ru-dimer</b> ( $\text{CD}_3\text{OD}$ )                                                                                                                                                                              | -            | -            | -            | -            | -            | 102.7; 98.5                            | 80.4; 79.3                             | 32.6            | 18.9                               |
| <b>L-4</b> ( $\text{CDCl}_3$ )                                                                                                                                                                                          | 150.5        | 126.2        | 137.3        | 123.5        | 143.2        | -                                      | -                                      | -               | -                                  |
| <b>L-5</b> ( $\text{CDCl}_3$ )                                                                                                                                                                                          | 150.6        | 126.3        | 137.4        | 123.6        | 143.2        | -                                      | -                                      | -               | -                                  |
| <b>L-6</b> ( $\text{CDCl}_3$ )                                                                                                                                                                                          | 150.6        | 126.2        | 137.3        | 123.5        | 143.3        | -                                      | -                                      | -               | -                                  |
| <b>L-7</b> ( $\text{CDCl}_3$ )                                                                                                                                                                                          | 150.5        | 126.2        | 137.3        | 123.6        | 143.2        | -                                      | -                                      | -               | -                                  |
| <b>L-8</b> ( $\text{CDCl}_3$ )                                                                                                                                                                                          | 150.5        | 126.2        | 137.3        | 123.6        | 143.3        | -                                      | -                                      | -               | -                                  |
| <b>L-9</b> ( $\text{CDCl}_3$ )                                                                                                                                                                                          | 150.4        | 126.3        | 137.4        | 123.5        | 143.1        | -                                      | -                                      | -               | -                                  |
| <b>L-10</b> ( $\text{CD}_3\text{OD}$ )                                                                                                                                                                                  | 151.4        | 127.9        | 139.3        | 124.5        | 144.0        | -                                      | -                                      | -               | -                                  |
| <b>L-11</b> ( $\text{CD}_3\text{OD}$ )                                                                                                                                                                                  | 151.4        | 127.9        | 139.3        | 124.5        | 144.0        | -                                      | -                                      | -               | -                                  |
| <b>L-12</b> ( $\text{CD}_3\text{OD}$ )                                                                                                                                                                                  | 151.4        | 127.9        | 139.3        | 124.5        | 144.1        | -                                      | -                                      | -               | -                                  |
| <b>Ru-4</b> ( $\text{CDCl}_3$ )                                                                                                                                                                                         | 156.6; 158.3 | 131.2-128.5* | 140.1; 140.3 | 125.2; 125.3 | 140.2; 139.1 | 104.8, 102.1; 107.0, 102.3             | 88.7-83.2; 85.5-83.6*                  | 31.1; 31.3      | 18.1; 18.8                         |
| <b>Ru-5</b> ( $\text{CDCl}_3$ )                                                                                                                                                                                         | 156.4; 157.6 | 130.0; 130.8 | 140.3; 140.5 | 125.4; 125.5 | 140.3; 139.5 | 105.0, 102.4; 106.4, 102.7             | 88.2-83.1*                             | 31.2; 31.3      | 18.3; 18.8                         |
| <b>Ru-6</b> ( $\text{CDCl}_3$ )                                                                                                                                                                                         | 157.0; 157.9 | 130.8-128.5* | 140.3; 140.4 | 125.1, 125.2 | 140.0; 139.3 | 104.9, 102.1; 106.3, 102.4             | 88.4-83.1*                             | 31.0; 31.2      | 18.1; 18.6                         |
| <b>Ru-7</b> ( $\text{CDCl}_3$ )                                                                                                                                                                                         | 156.5; 157.4 | 129.9; 130.5 | 140.1; 140.3 | 125.2; 125.3 | 139.9; 139.2 | 105.1, 102.2; 106.2, 102.6             | 87.6-82.9; 85.7-83.0*                  | 31.0; 31.1      | 18.1; 18.5                         |
| <b>Ru-8</b> ( $\text{CDCl}_3$ )                                                                                                                                                                                         | 156.3; 157.9 | 130.9-128.5* | 140.2; 140.3 | 125.2; 125.3 | 140.2; 139.3 | 104.7, 102.0; 106.8, 102.3             | 88.8-83.0*                             | 31.1; 31.3      | 18.0; 18.7                         |
| <b>Ru-9</b> ( $\text{CDCl}_3$ )                                                                                                                                                                                         | 156.9; 156.8 | 130.3        | 140.4        | 125.4; 125.3 | 139.8; 139.7 | 105.9, 102.4; 105.7, 102.3             | 87.2-83.3*                             | 31.3            | 18.5; 18.4                         |
| <b>Ru-10</b> ( $\text{CD}_3\text{OD}$ )                                                                                                                                                                                 | 158.3        | 131.1        | 142.0        | 126.6; 126.5 | 141.6; 141.5 | 107.3, 103.5 107.2, 103.4              | 87.4-84.8*                             | 32.4            | 18.8                               |
| <b>Ru-11</b> ( $\text{CD}_3\text{OD}$ )                                                                                                                                                                                 | 158.2        | 131.1        | 142.0        | 126.6; 126.5 | 141.6; 141.5 | 107.4, 103.5 107.4, 103.4              | 87.4-84.8*                             | 32.4            | 18.7                               |
| <b>Ru-12</b> ( $\text{CD}_3\text{OD}$ )                                                                                                                                                                                 | 158.1        | 131.1        | 141.9        | 126.5; 126.4 | 141.6; 141.5 | 107.4, 103.5 107.3, 103.4              | 87.2-84.7*                             | 32.4            | 18.7                               |
| *Signals were not assigned precisely.                                                                                                                                                                                   |              |              |              |              |              |                                        |                                        |                 |                                    |

| <b>Table S8.</b> Changes of the chemical shifts of selected <sup>13</sup> C NMR resonances as a result of the complex formation for <b>Ru-4–Ru-12</b><br>( $\Delta = \delta_{\text{complex}} - \delta_{\text{ligand}}$ or <b>Ru-dimer</b> ) |                         |                         |                         |                         |                         |                                       |                 |                                                |
|---------------------------------------------------------------------------------------------------------------------------------------------------------------------------------------------------------------------------------------------|-------------------------|-------------------------|-------------------------|-------------------------|-------------------------|---------------------------------------|-----------------|------------------------------------------------|
|                                                                                                                                                                                                                                             | $\Delta(\text{Py-C-6})$ | $\Delta(\text{Py-C-5})$ | $\Delta(\text{Py-C-4})$ | $\Delta(\text{Py-C-3})$ | $\Delta(\text{Py-C-2})$ | $\Delta(p\text{-cym-C}_{\text{qAr}})$ | <i>i</i> -Pr-CH | C <sub>6</sub> H <sub>4</sub> -CH <sub>3</sub> |
| <b>Ru-4</b> (CDCl <sub>3</sub> )                                                                                                                                                                                                            | +6.1<br>+7.8            | *                       | +2.8<br>+3.0            | +1.7<br>+1.8            | -3.0<br>-4.1            | +3.6, +5.3<br>+5.8, +5.5              | +0.5<br>+0.7    | -0.9<br>-0.2                                   |
| <b>Ru-5</b> (CDCl <sub>3</sub> )                                                                                                                                                                                                            | +5.8<br>+7.0            | +3.7<br>+4.5            | +2.9<br>+3.1            | +1.8<br>+1.9            | -2.9<br>-3.7            | +3.8, +5.6<br>+5.2, +5.9              | +0.6<br>+0.7    | -0.7<br>-0.2                                   |
| <b>Ru-6</b> (CDCl <sub>3</sub> )                                                                                                                                                                                                            | +6.4<br>+7.3            | *                       | +3.0<br>+3.1            | +1.6<br>+1.7            | -3.3<br>-4.0            | +3.7, +5.3<br>+5.1, +5.6              | +0.4<br>+0.6    | -0.9<br>-0.4                                   |
| <b>Ru-7</b> (CDCl <sub>3</sub> )                                                                                                                                                                                                            | +6.0<br>+6.9            | +3.7<br>+4.3            | +2.8<br>+3.0            | +1.6<br>+1.7            | -3.3<br>-4.0            | +3.9, +5.4<br>+5.0, +5.8              | +0.4<br>+0.5    | -0.9<br>-0.5                                   |
| <b>Ru-8</b> (CDCl <sub>3</sub> )                                                                                                                                                                                                            | +5.8<br>+7.4            | *                       | +2.9<br>+3.0            | +1.6<br>+1.7            | -3.1<br>-4.0            | +3.5, +5.2<br>+5.6, +5.5              | +0.5<br>+0.7    | -1.0<br>-0.3                                   |
| <b>Ru-9</b> (CDCl <sub>3</sub> )                                                                                                                                                                                                            | +6.5<br>+6.4            | +4.0                    | +3.0                    | +1.9<br>+1.8            | -3.3<br>-3.4            | +4.7, +5.6<br>+4.5, +5.5              | +0.7            | -0.5<br>-0.6                                   |
| <b>Ru-10</b> (CD <sub>3</sub> OD)                                                                                                                                                                                                           | +6.9                    | +3.2                    | +2.7                    | +2.1<br>+2.0            | -2.4<br>-2.5            | +4.6, +5.0<br>+4.5, +4.9              | -0.2            | -0.1                                           |
| <b>Ru-11</b> (CD <sub>3</sub> OD)                                                                                                                                                                                                           | +6.8                    | +3.2                    | +2.7                    | +2.1<br>+2.0            | -2.4<br>-2.5            | +4.7, +5.0<br>+4.7, +4.9              | -0.2            | -0.2                                           |
| <b>Ru-12</b> (CD <sub>3</sub> OD)                                                                                                                                                                                                           | +6.7                    | +3.2                    | +2.6                    | +2.0<br>+1.9            | -2.5<br>-2.6            | +4.7, +5.0<br>+4.6, +4.9              | -0.2            | -0.2                                           |
| *Due to uncertain signal assignment the data could not be calculated precisely.                                                                                                                                                             |                         |                         |                         |                         |                         |                                       |                 |                                                |

## 2. Copies of $^1\text{H}$ and $^{13}\text{C}$ NMR spectra

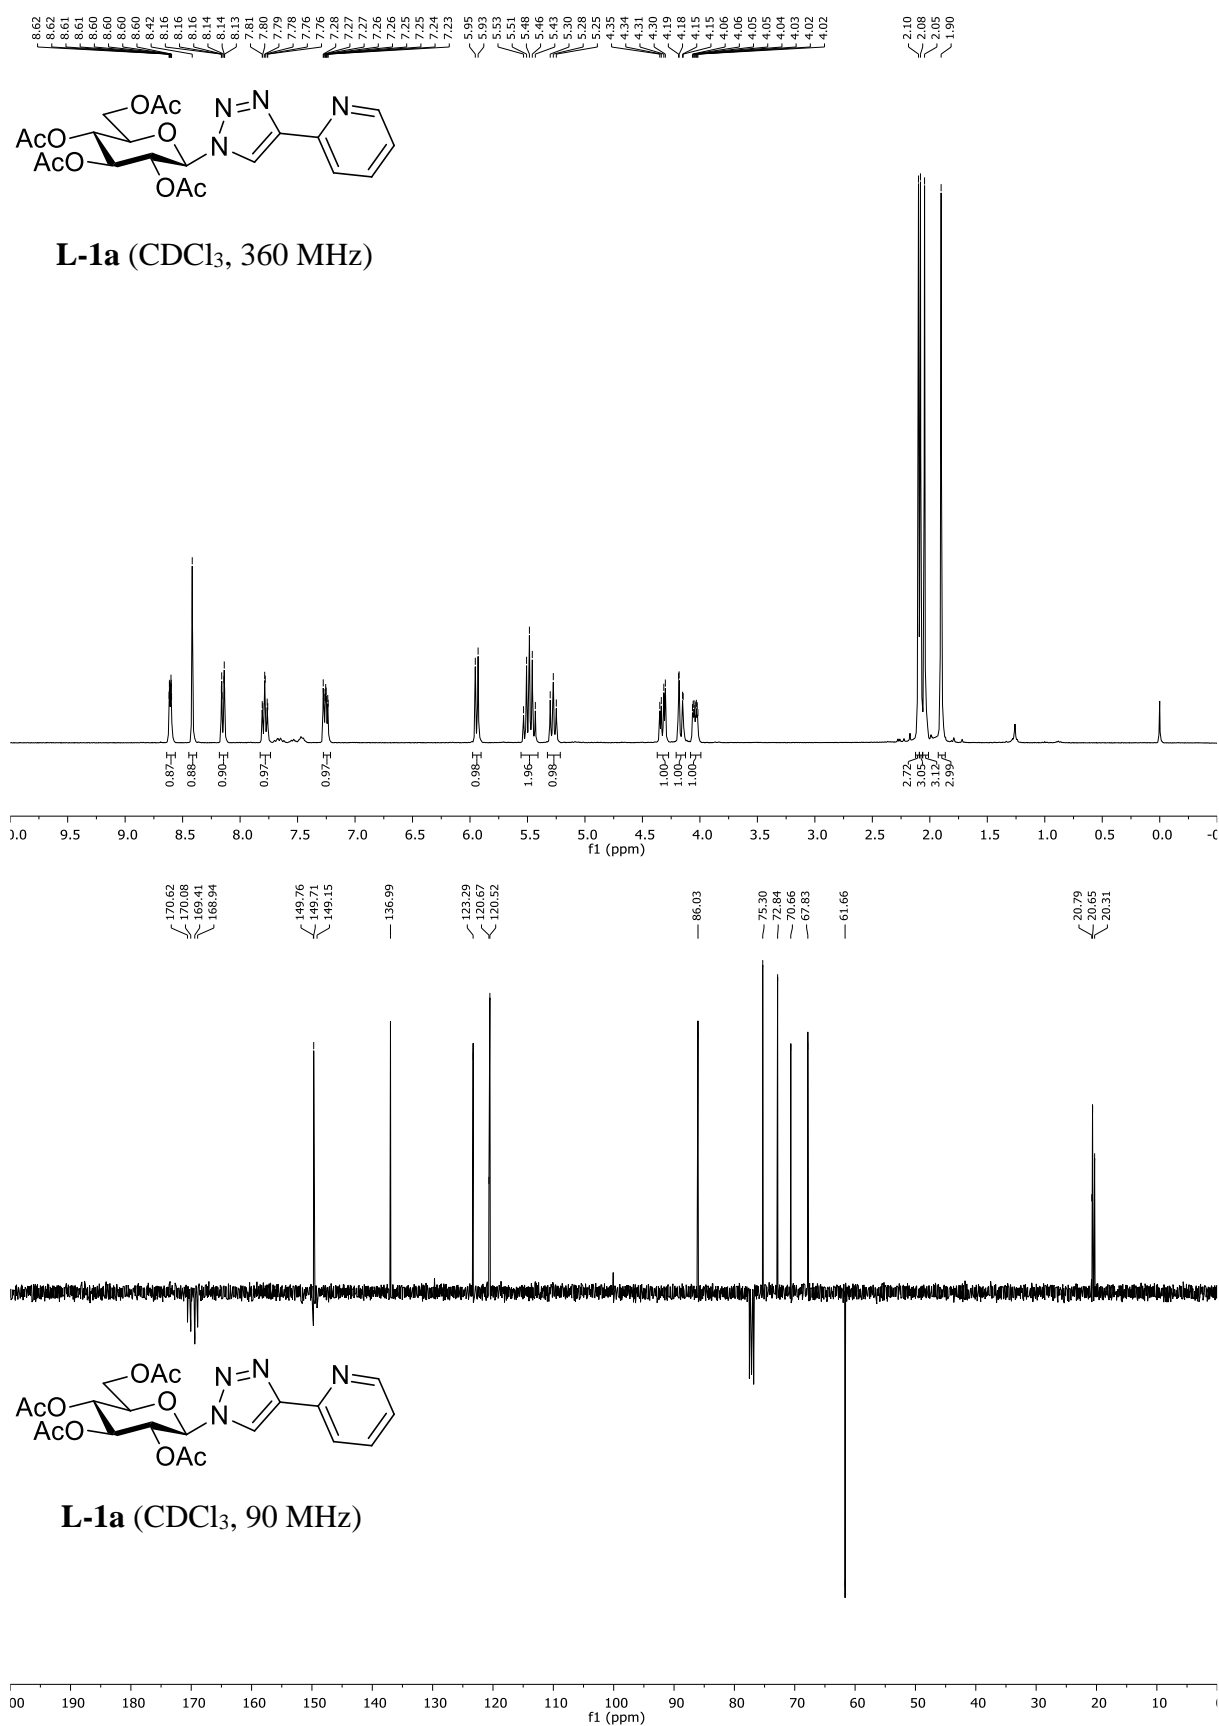

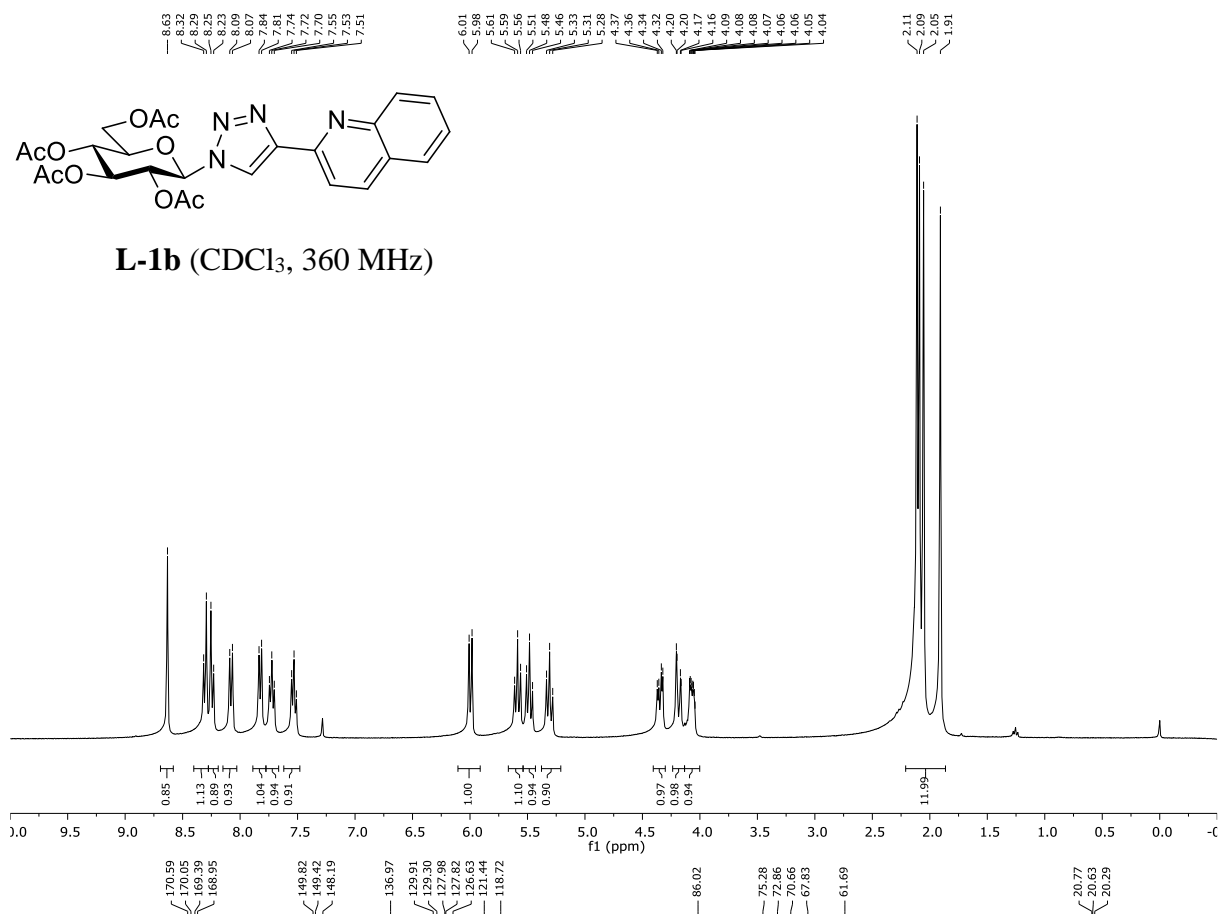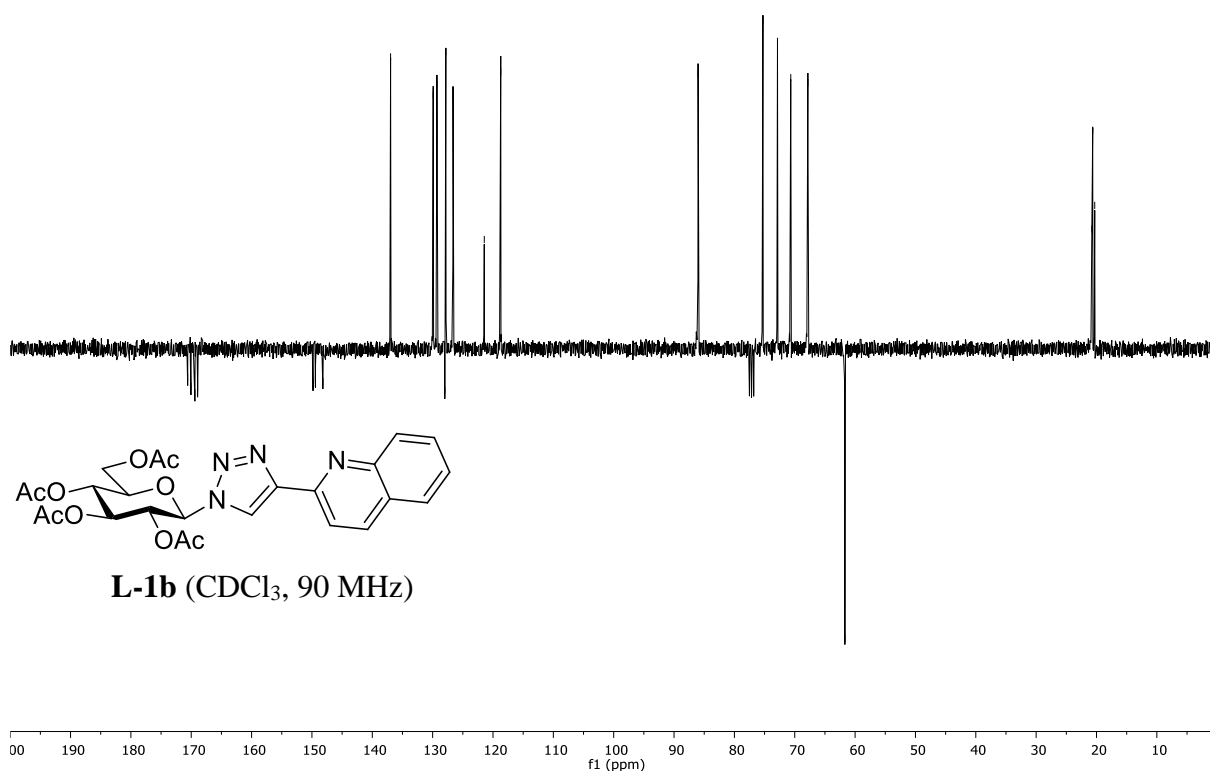



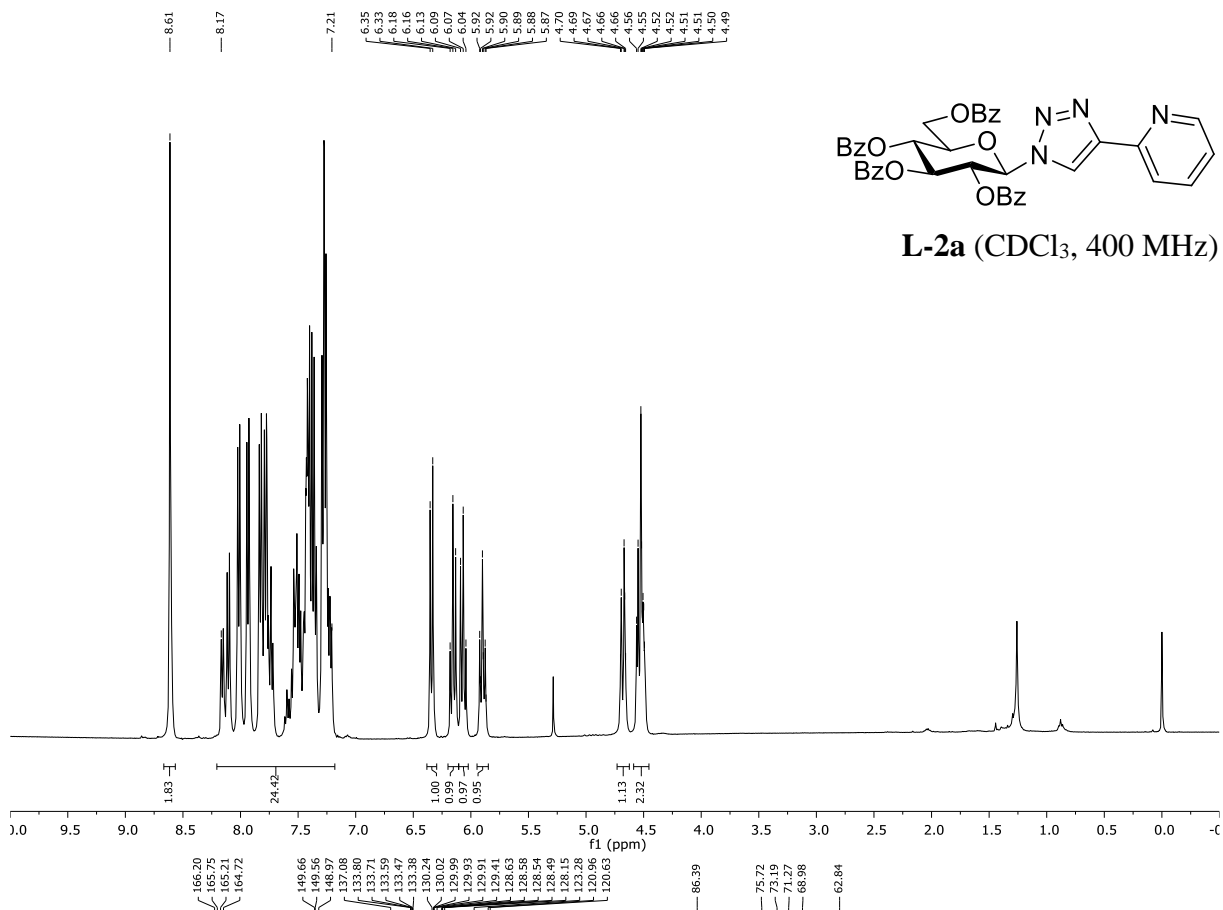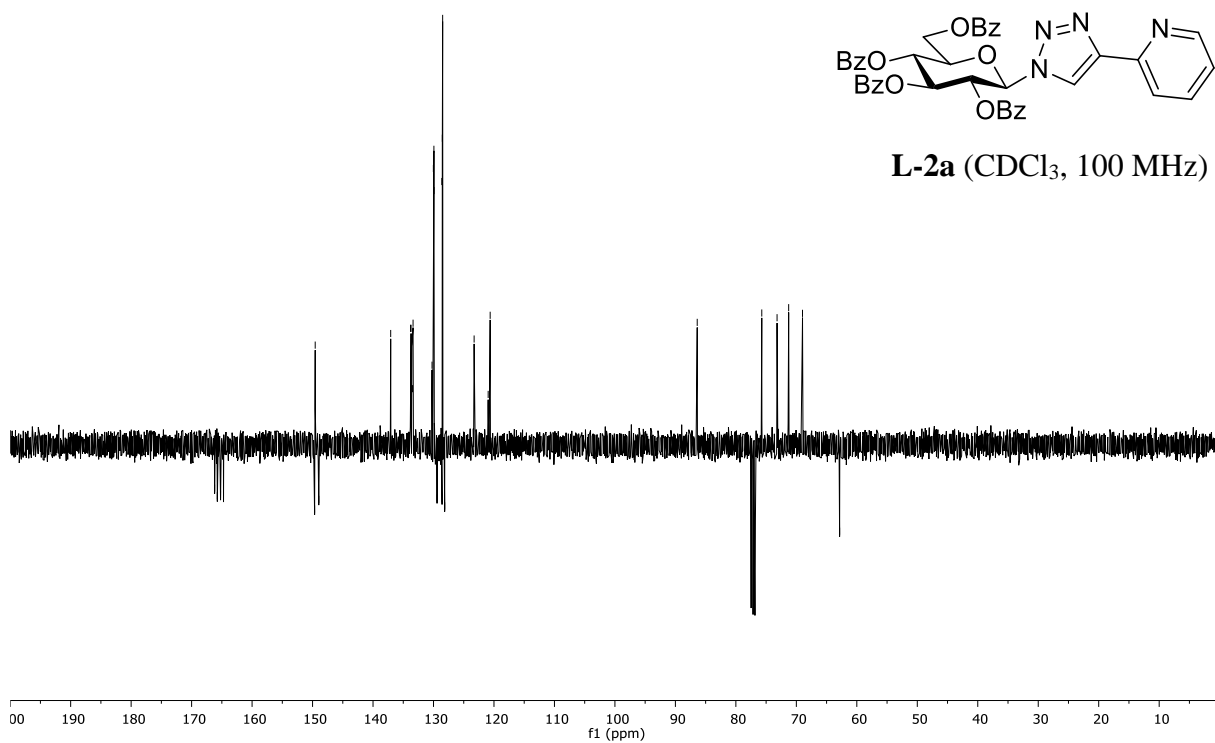

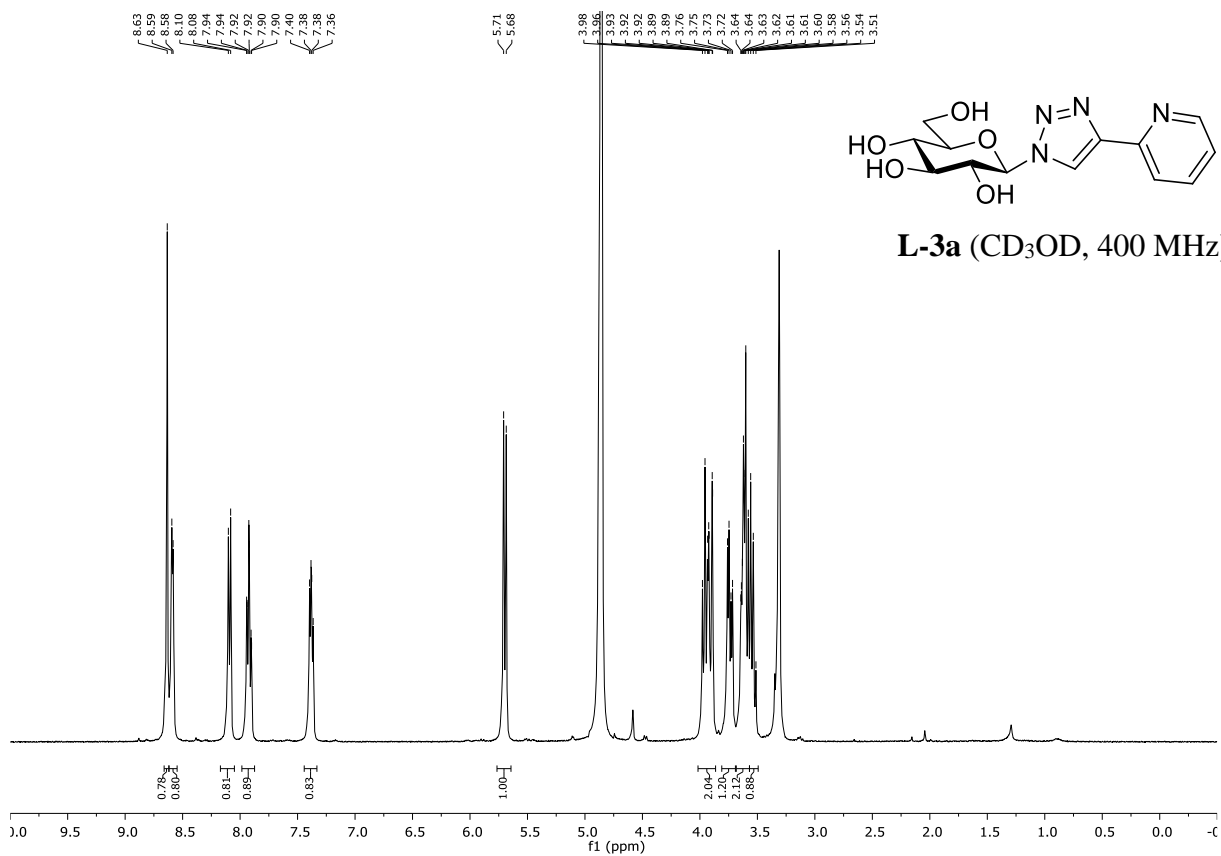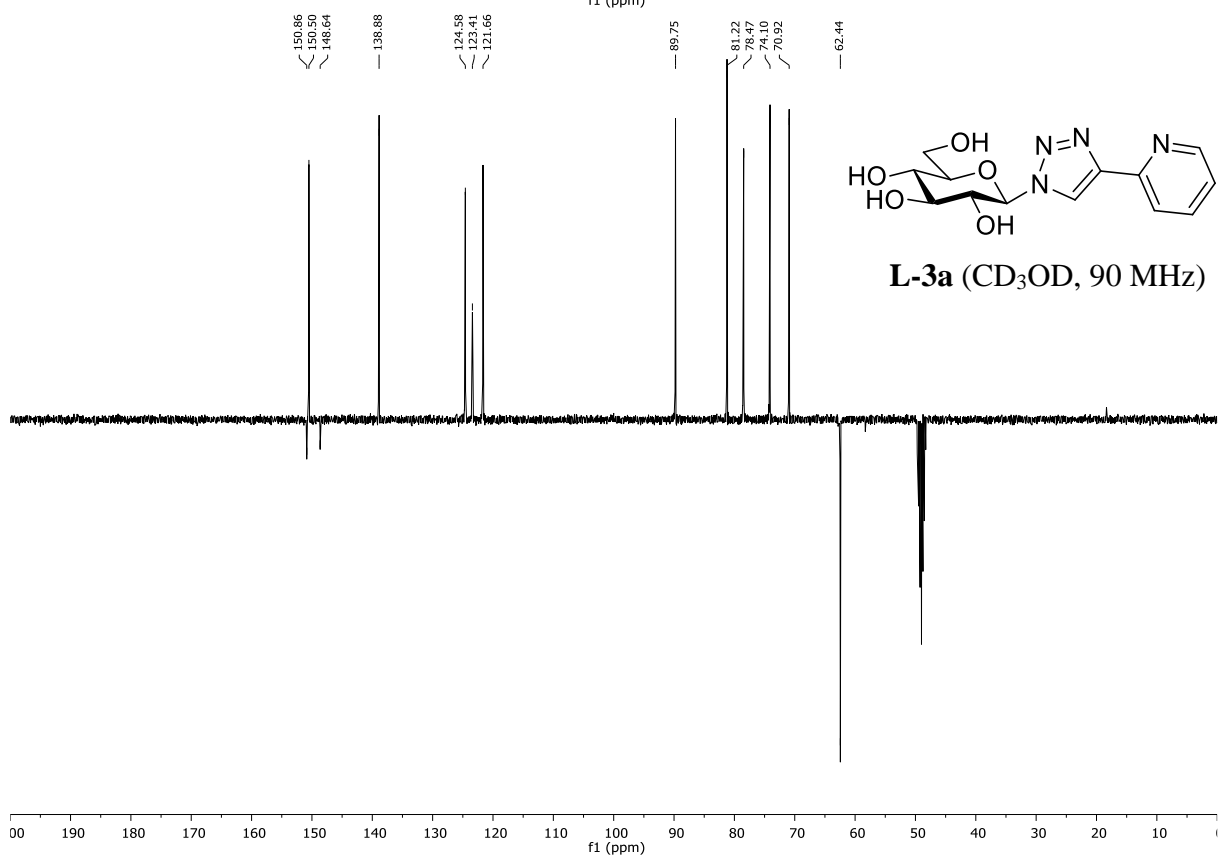

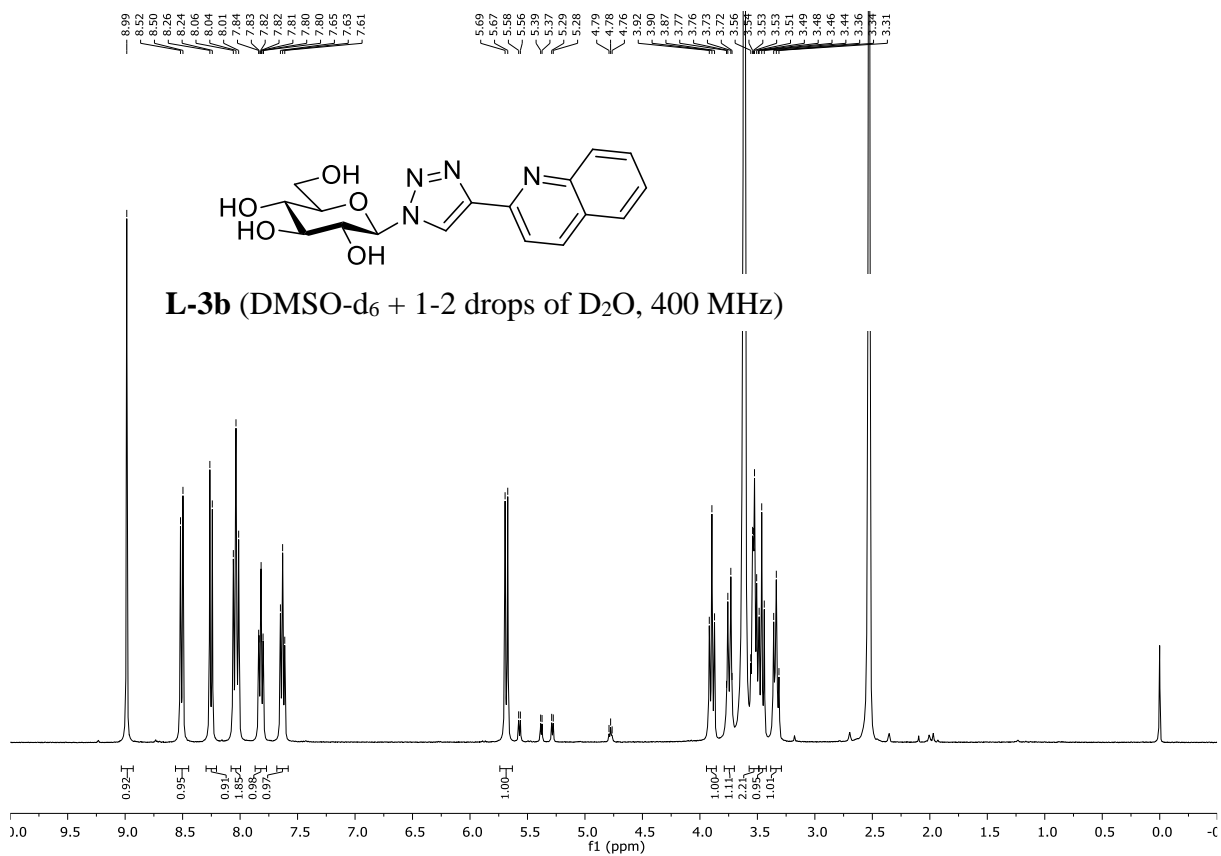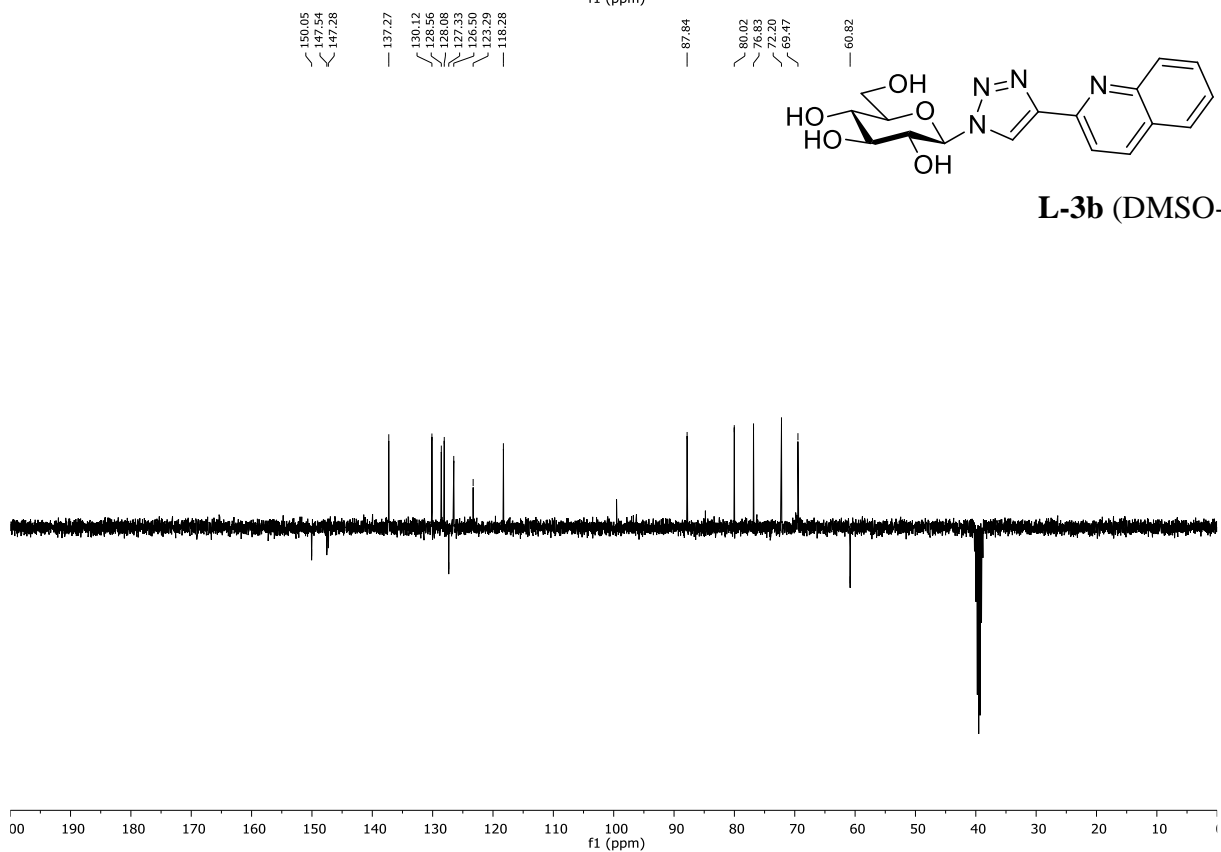

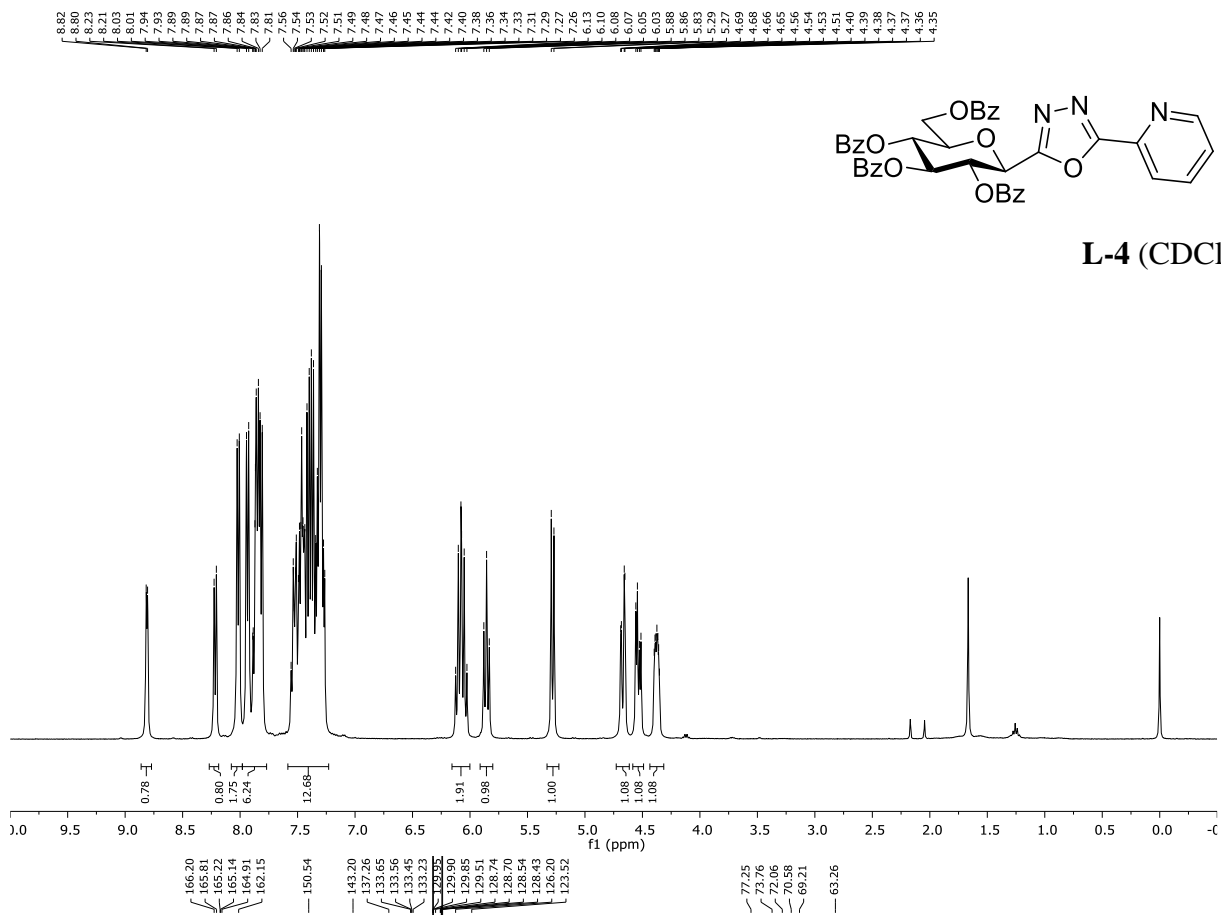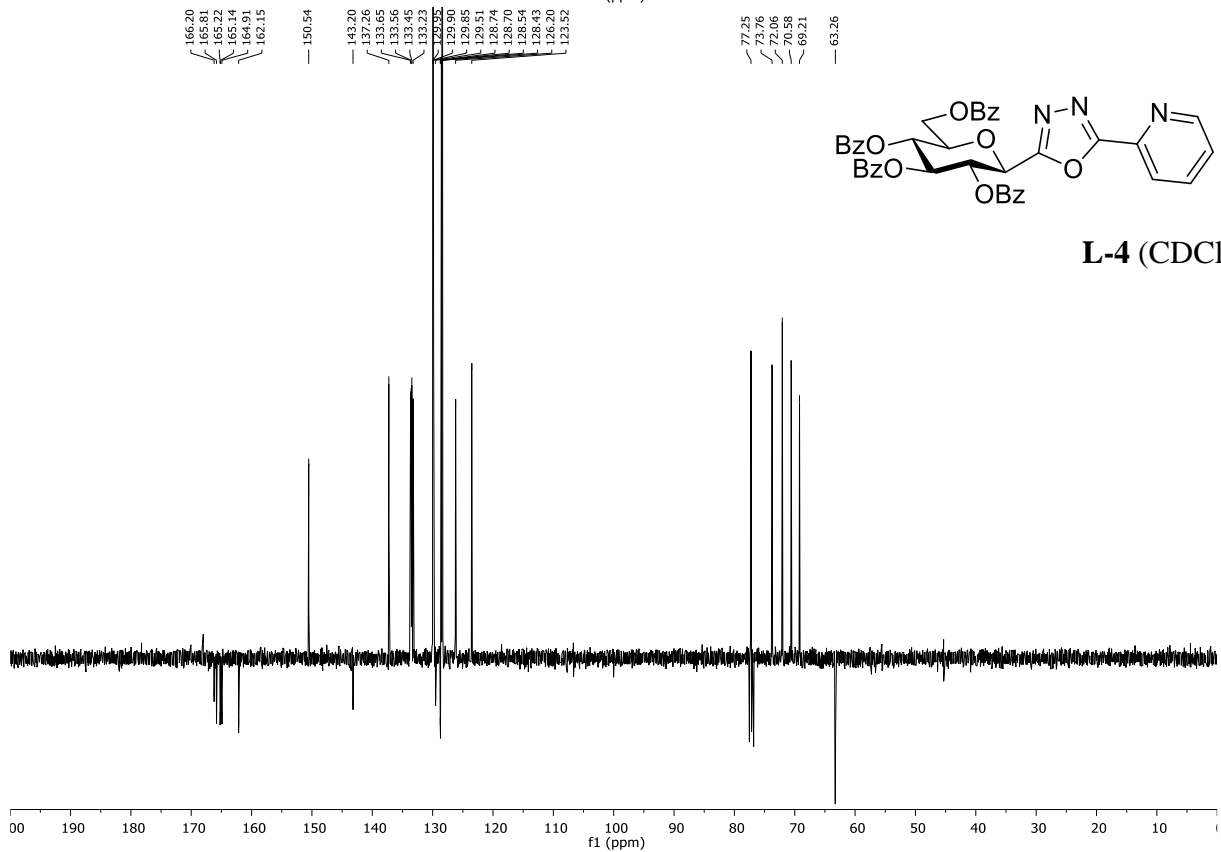

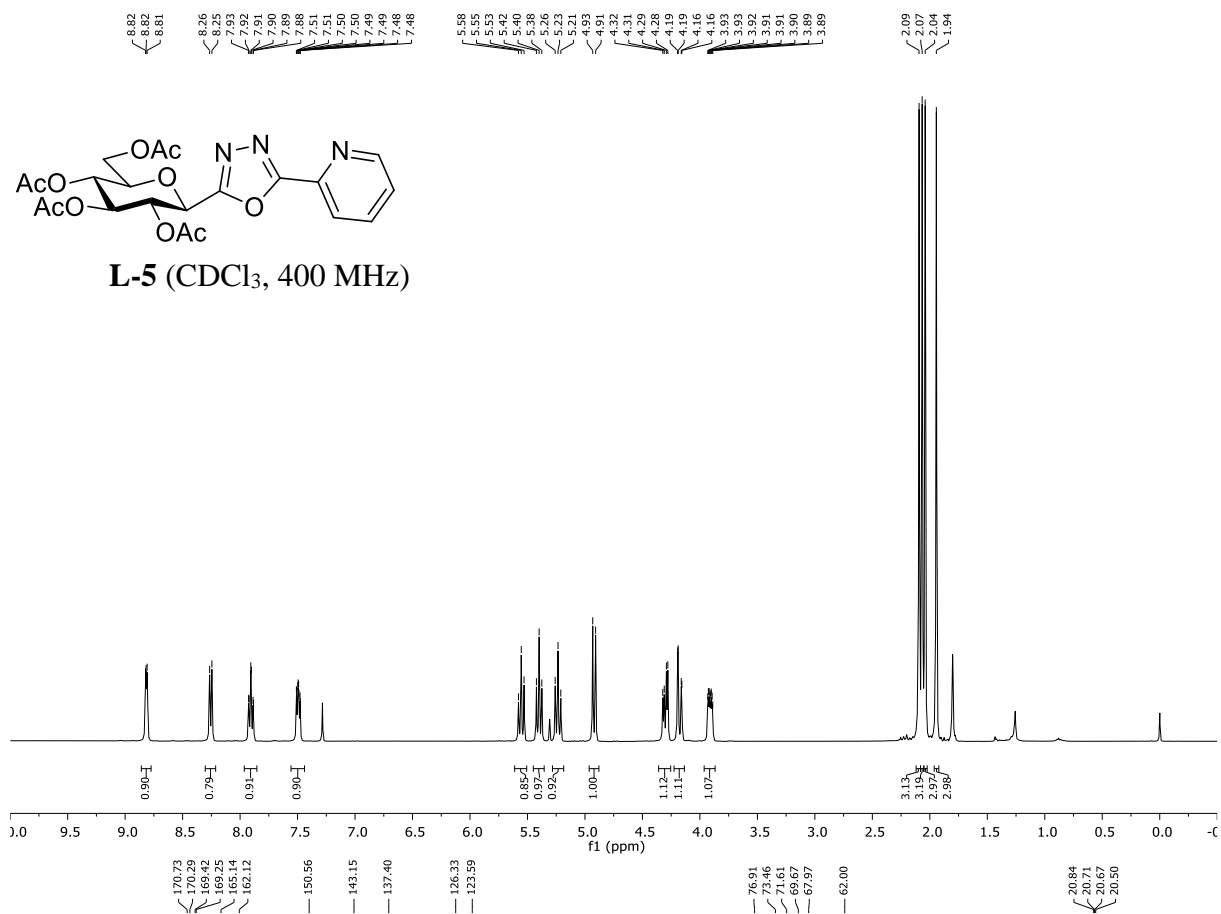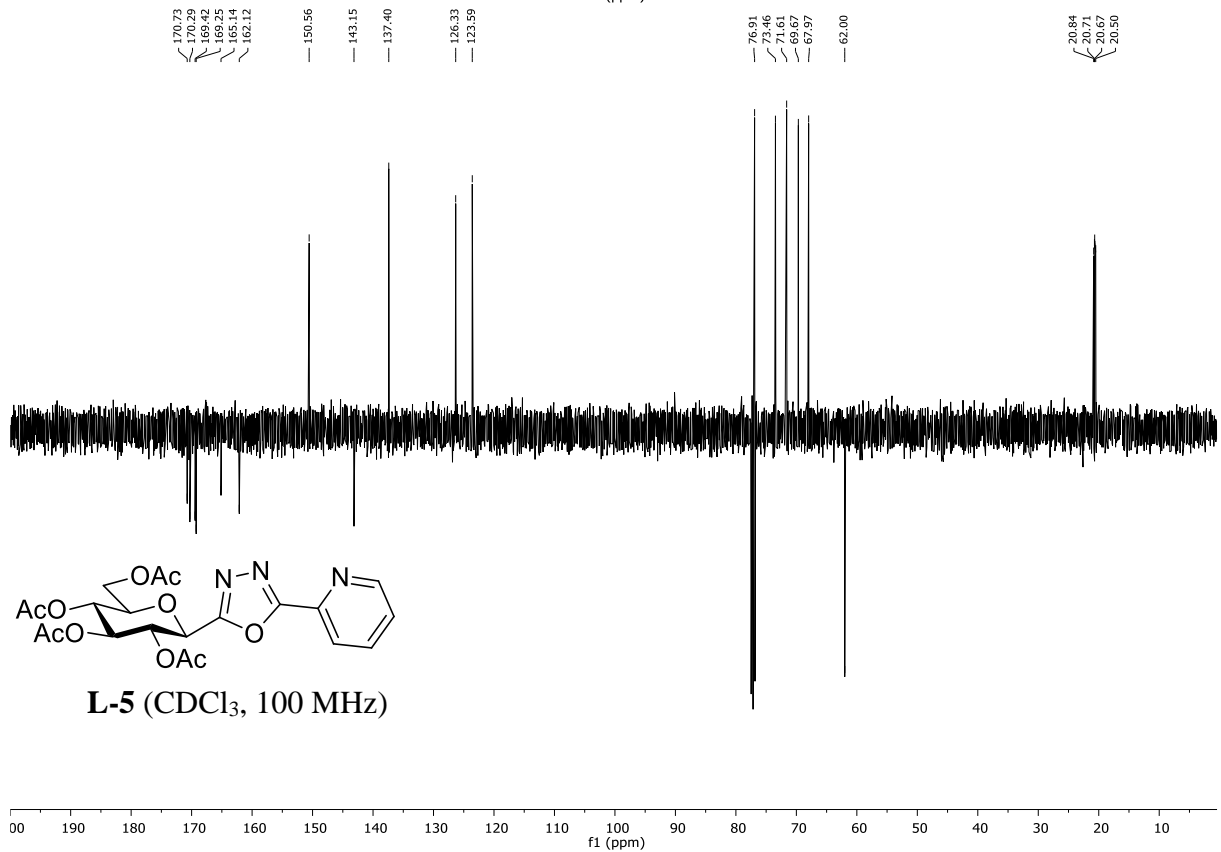

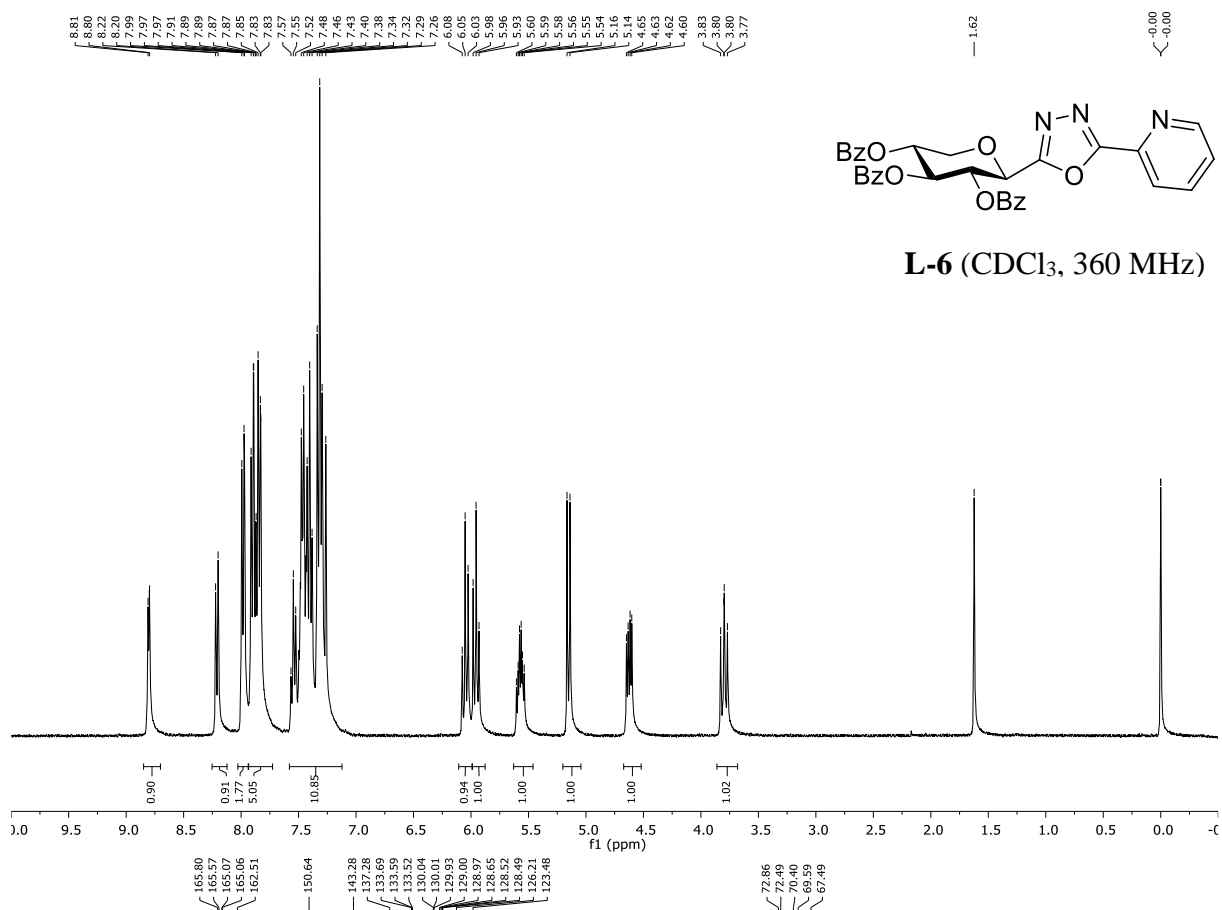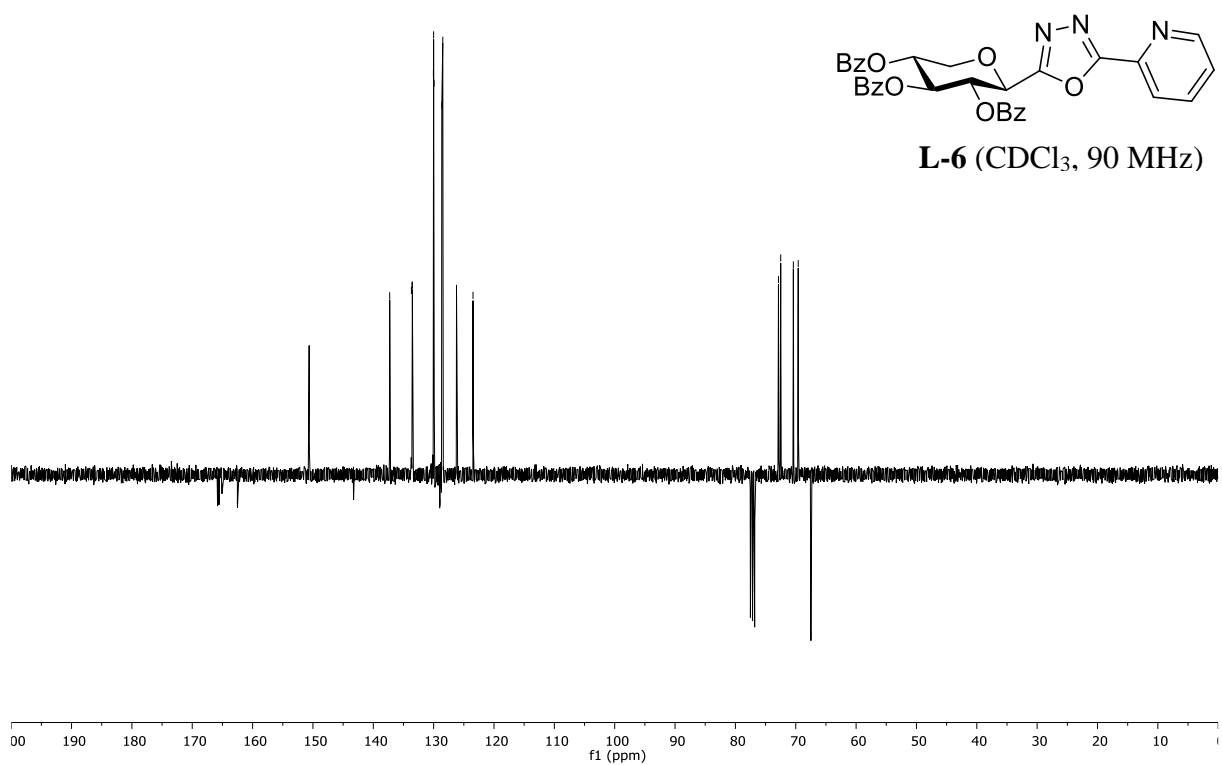

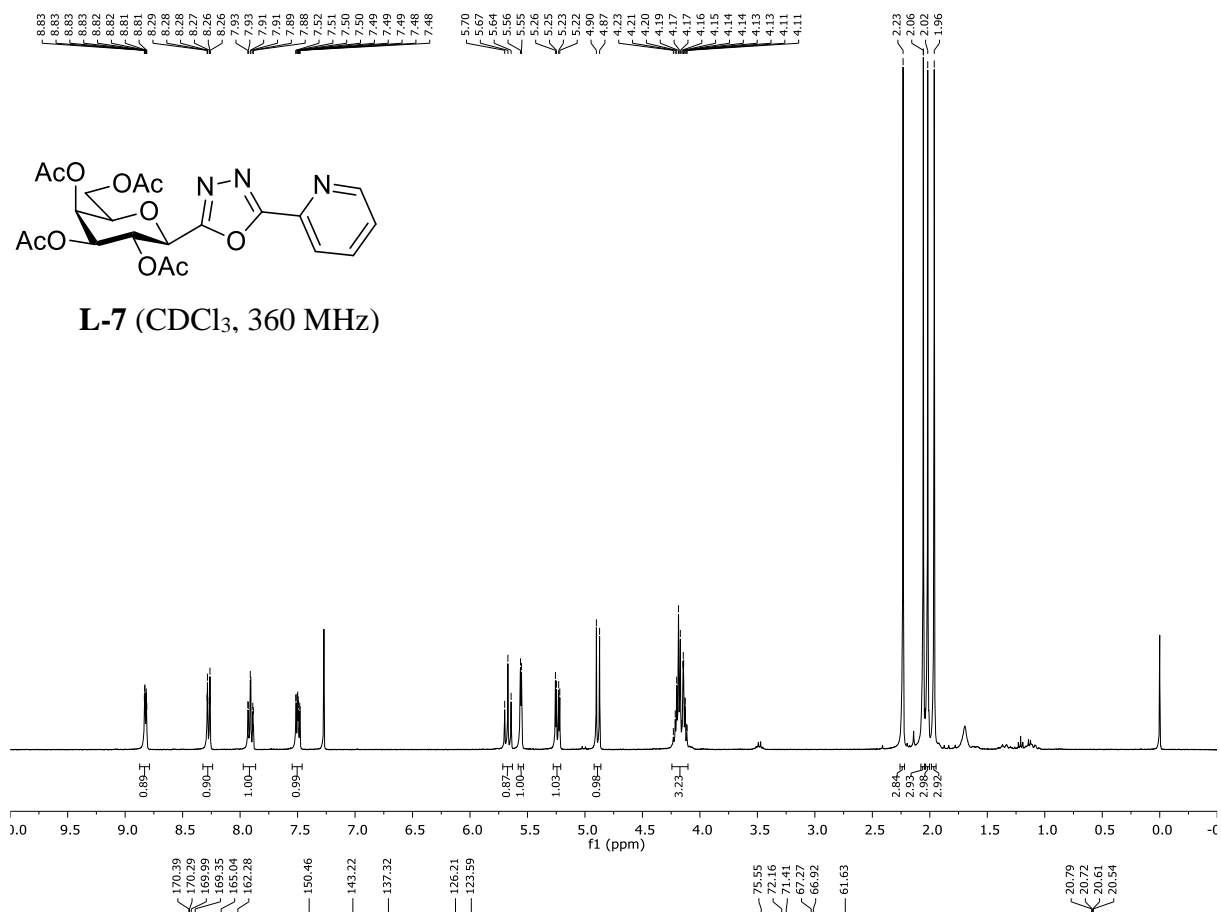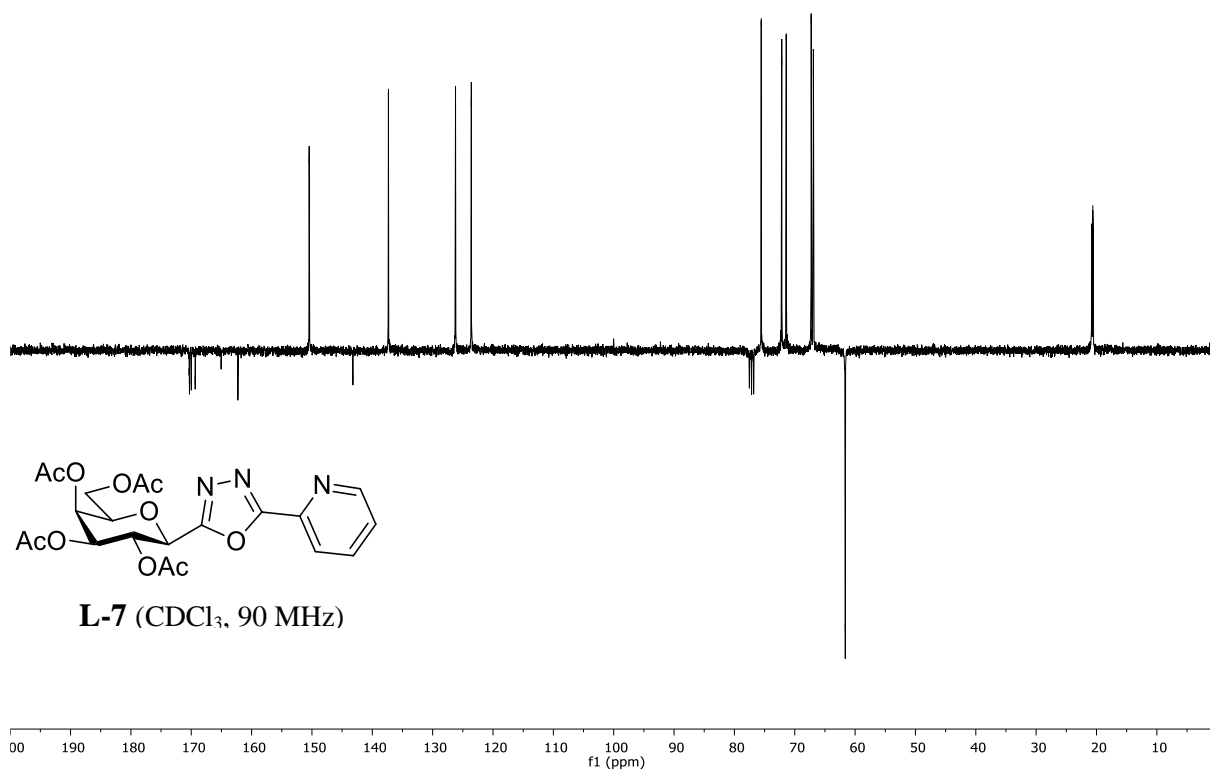

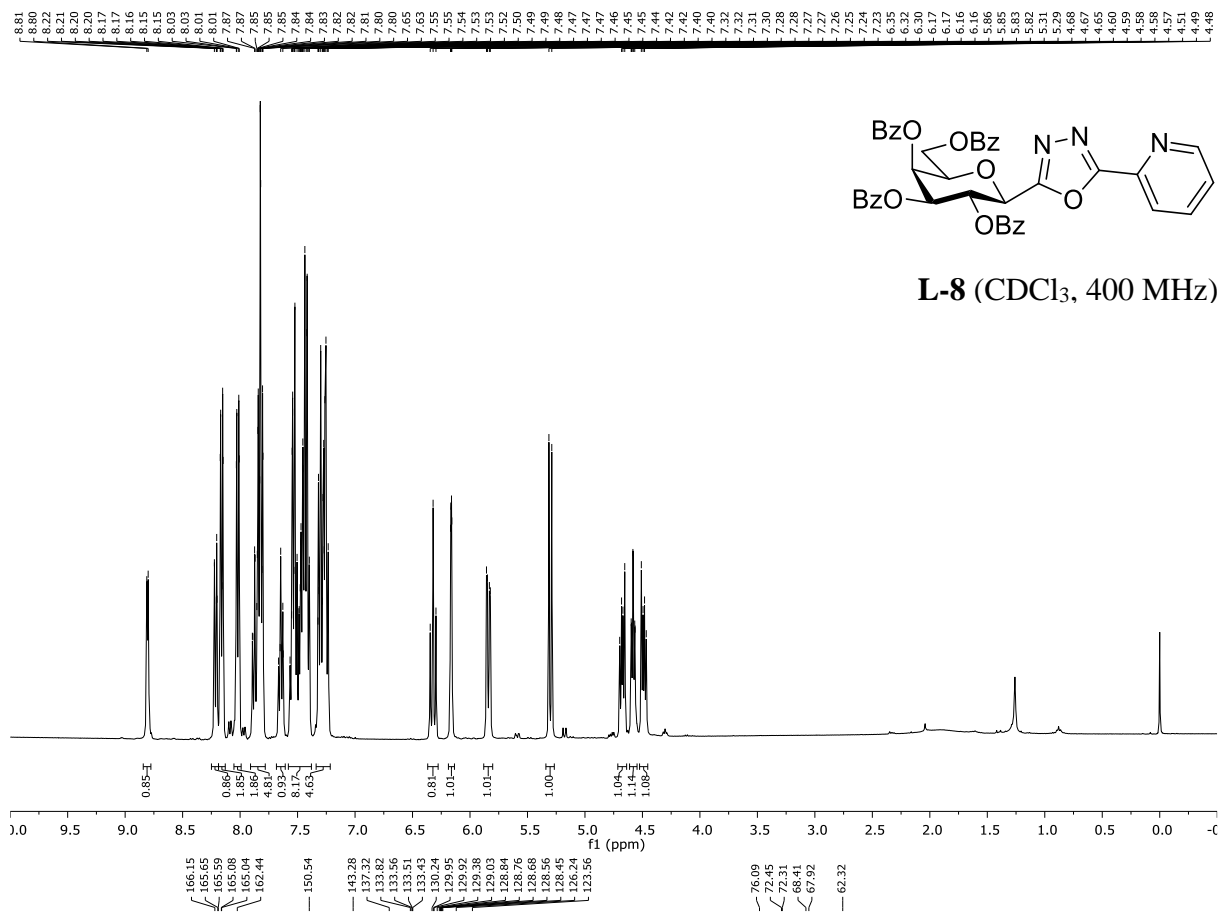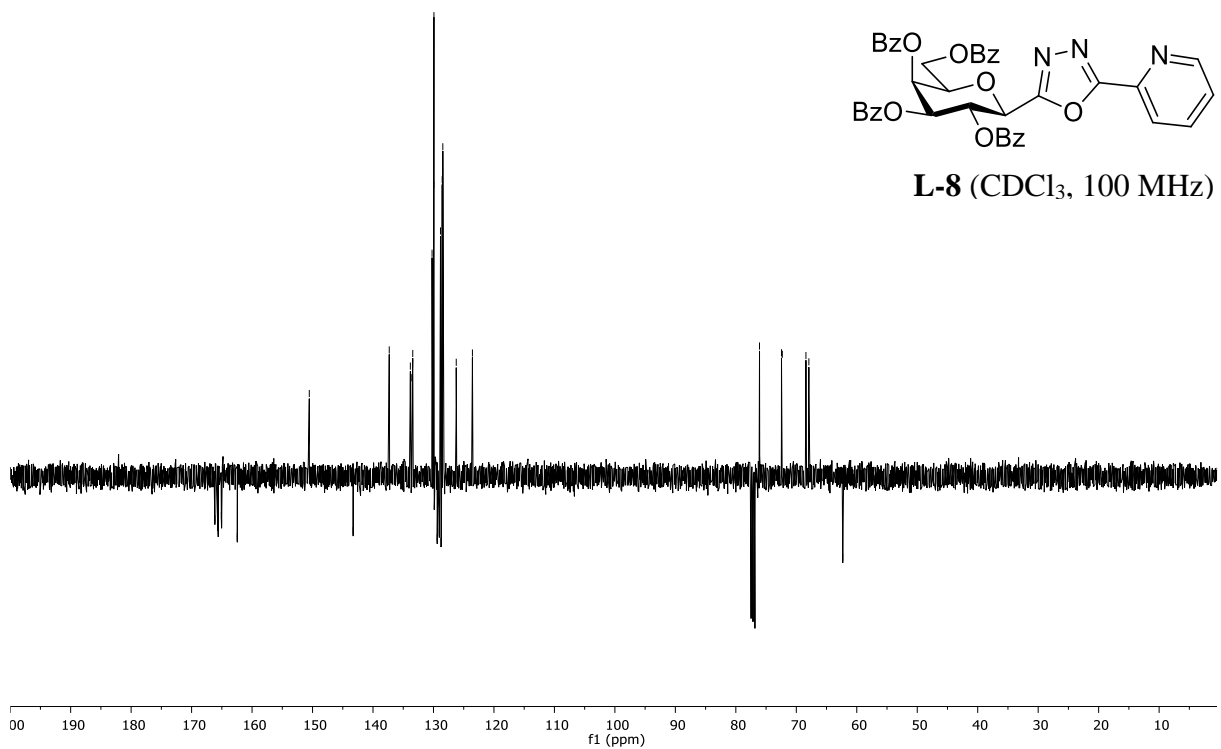



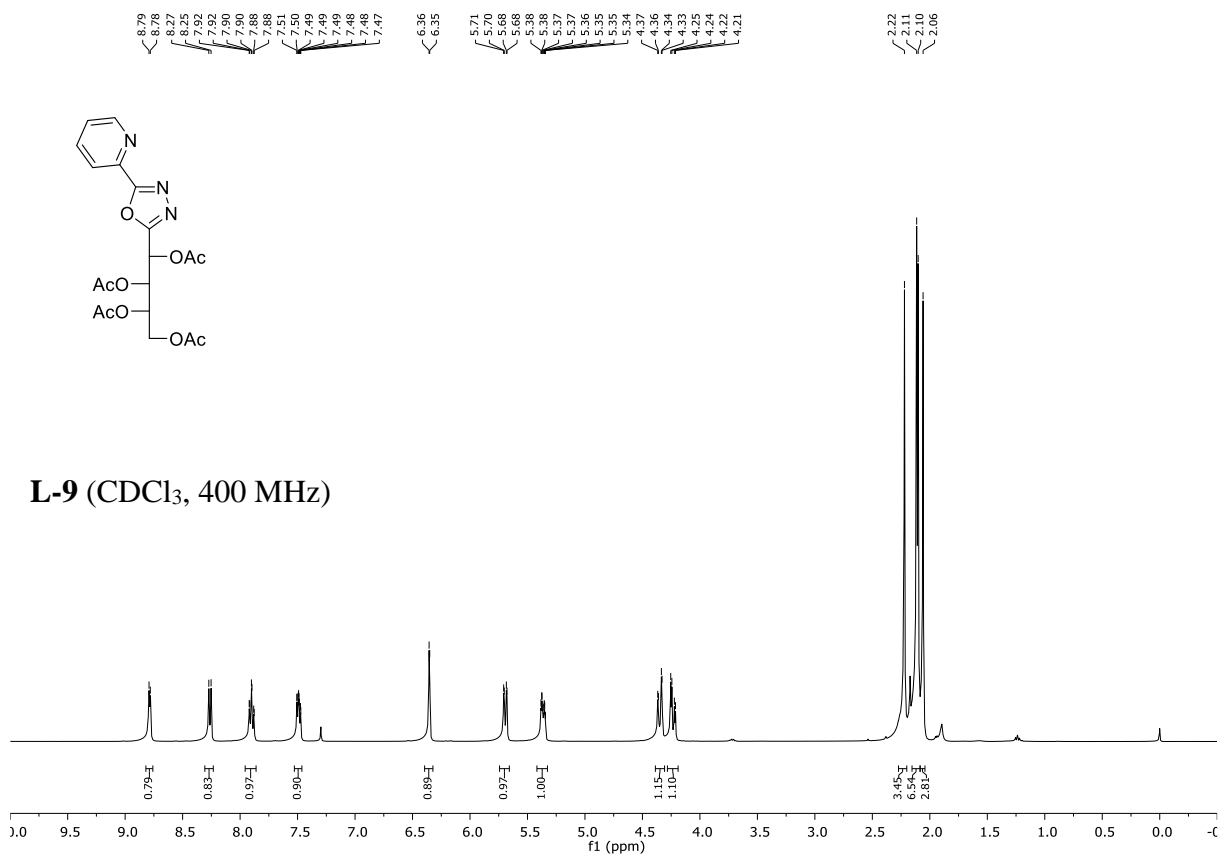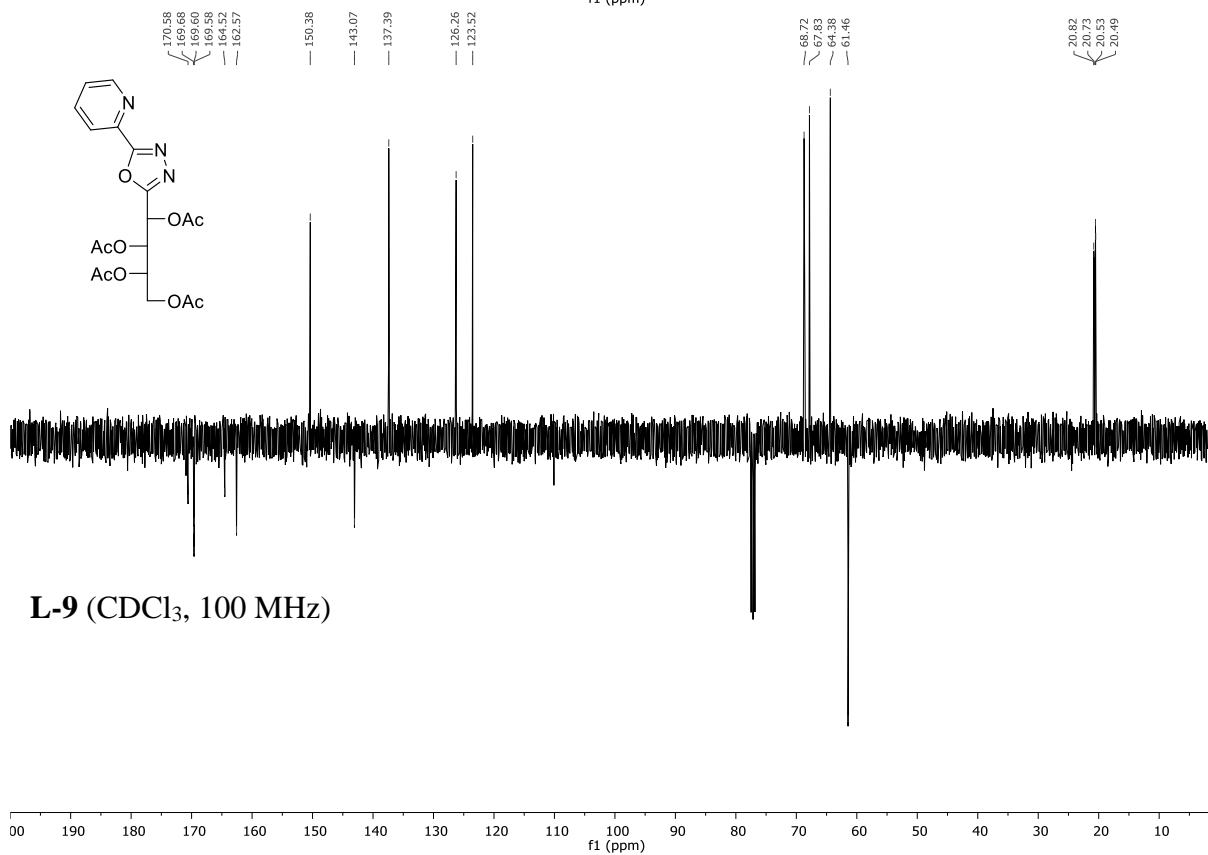

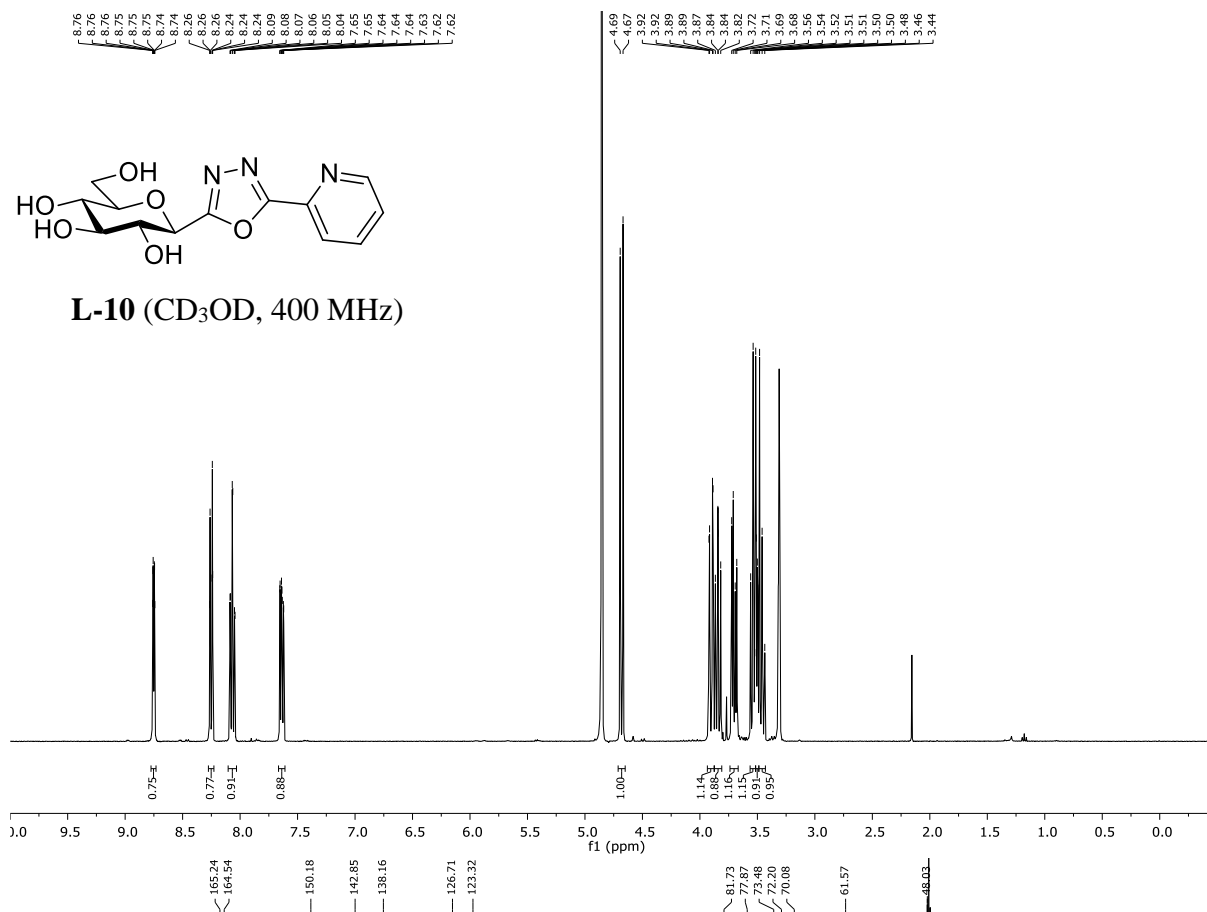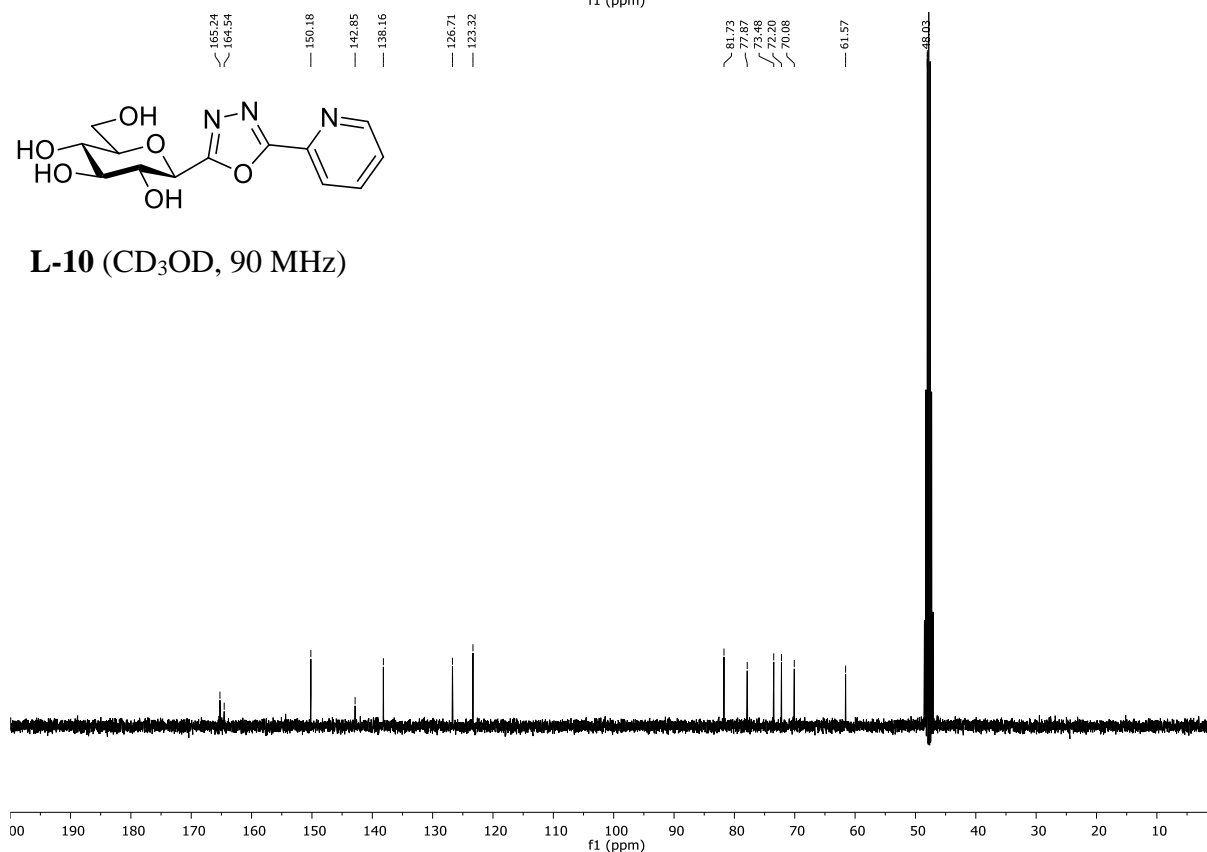

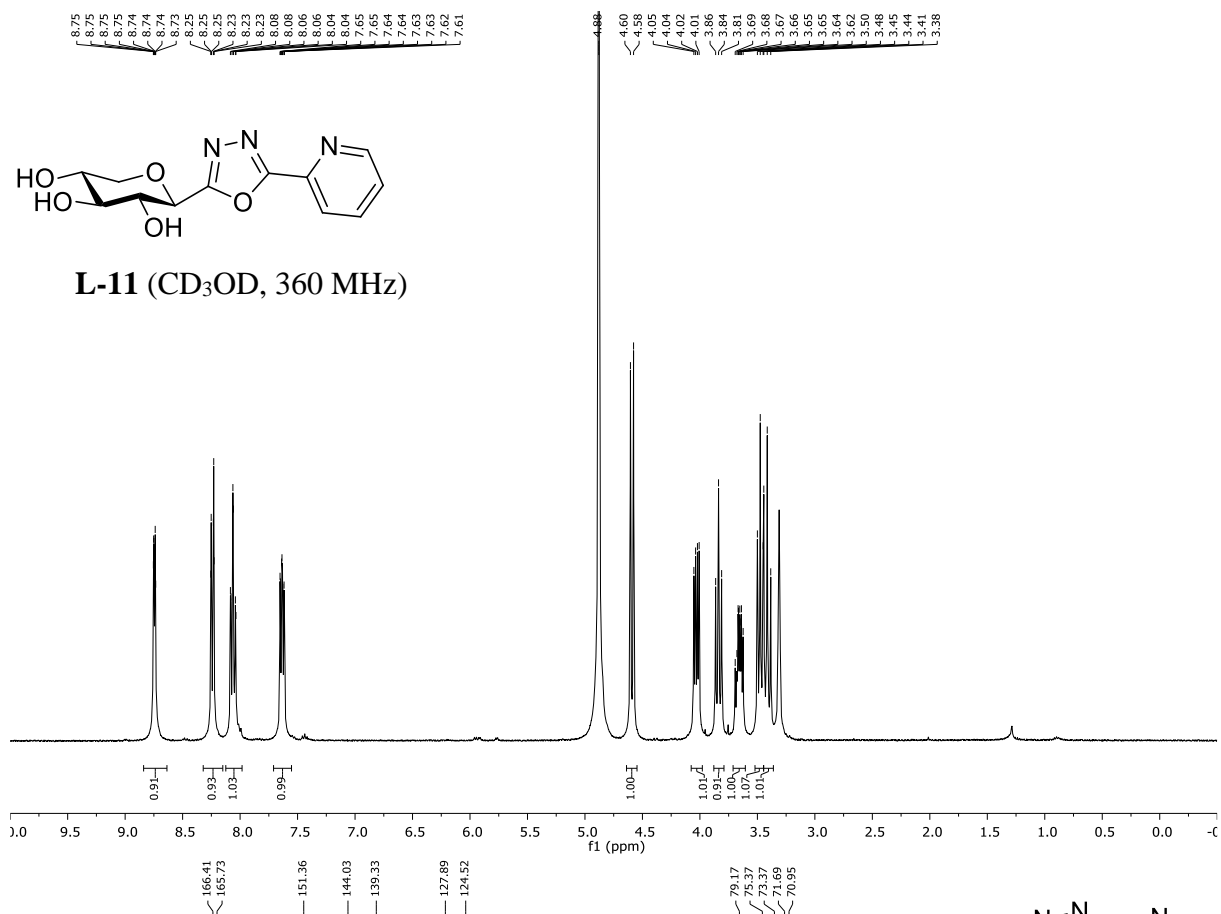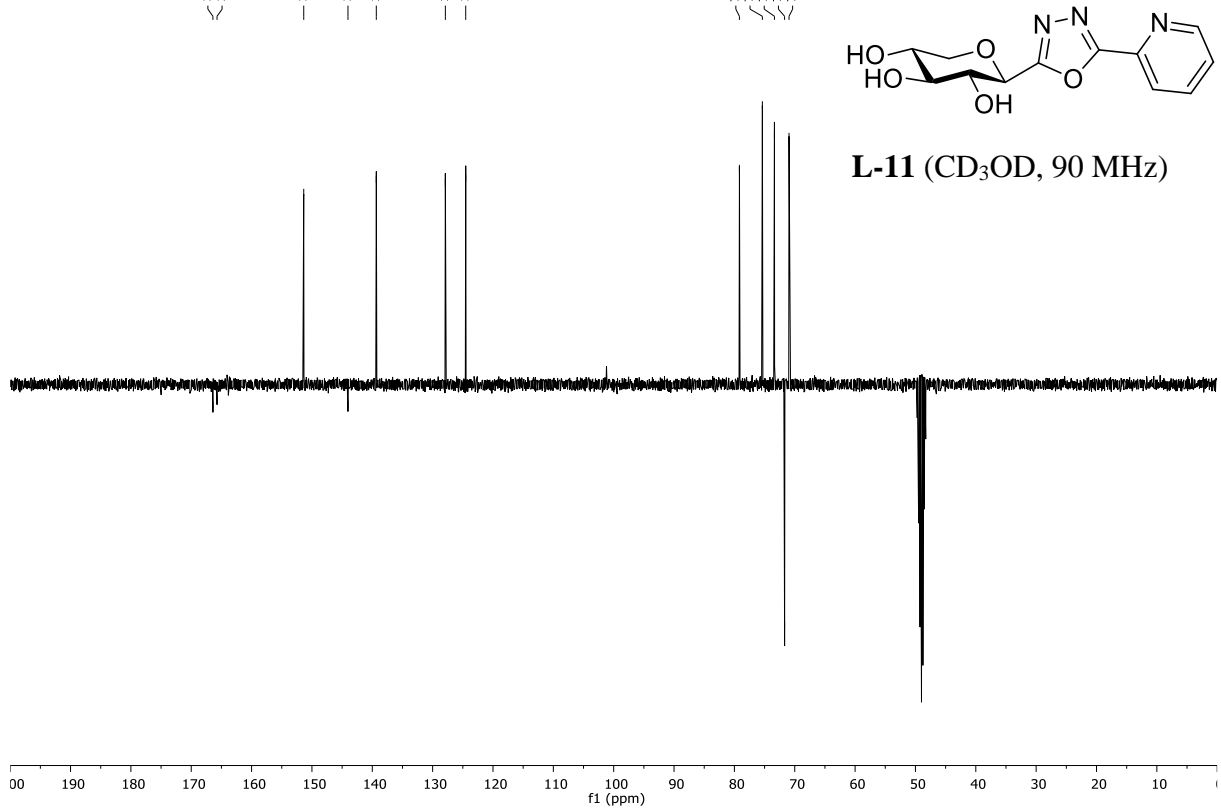



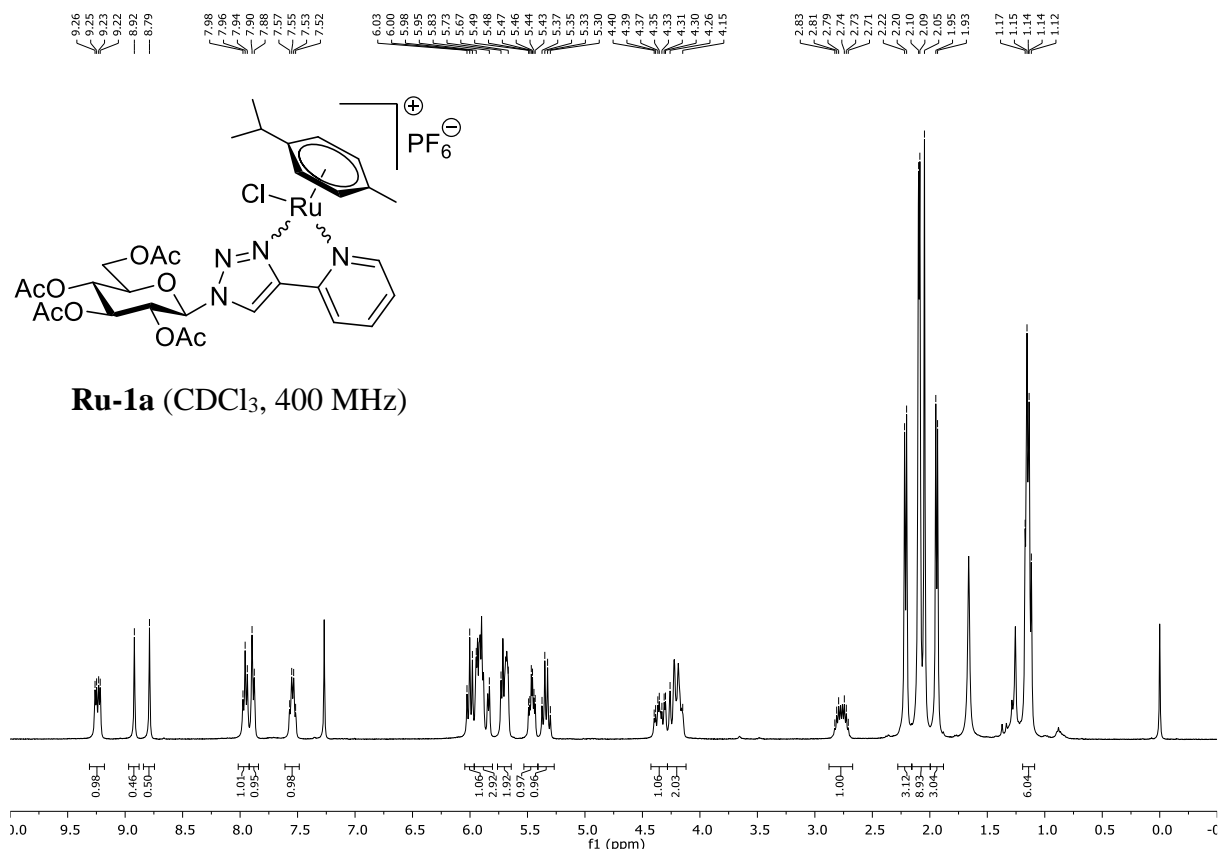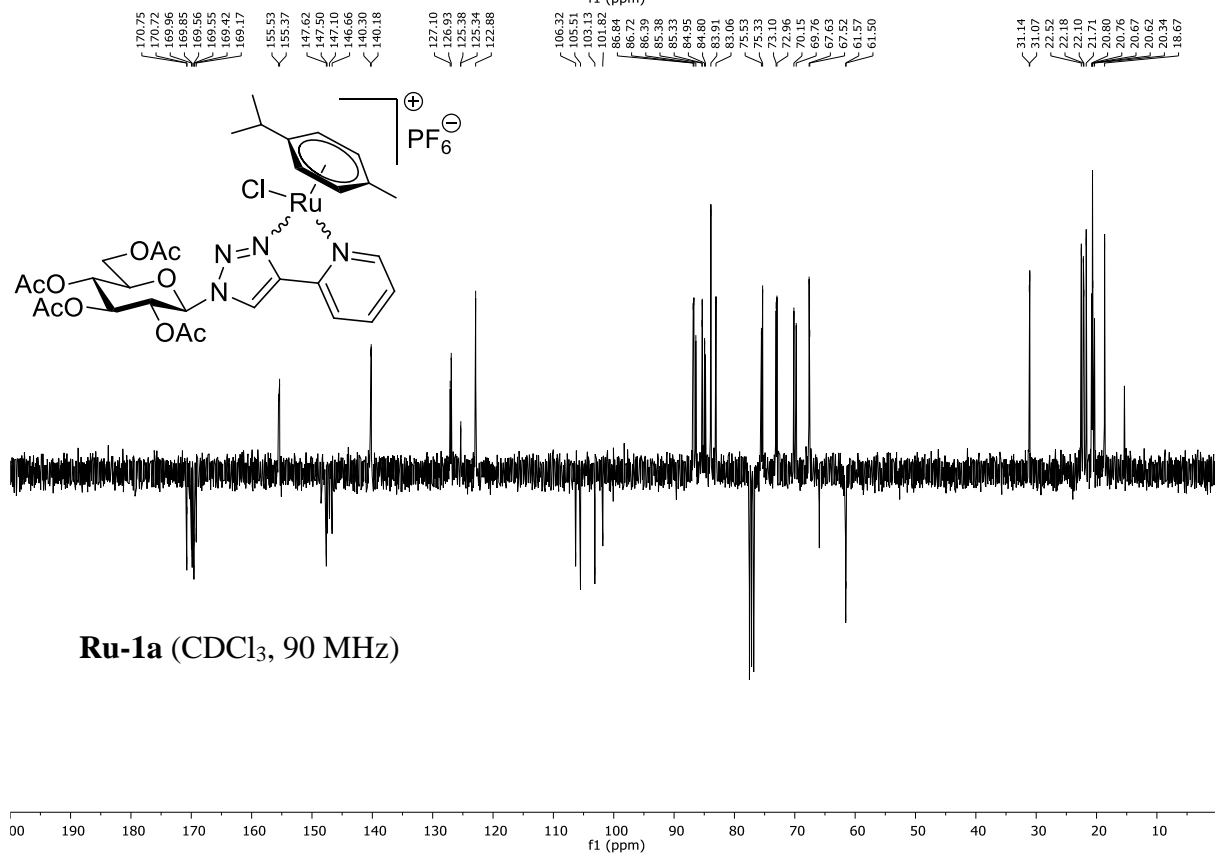

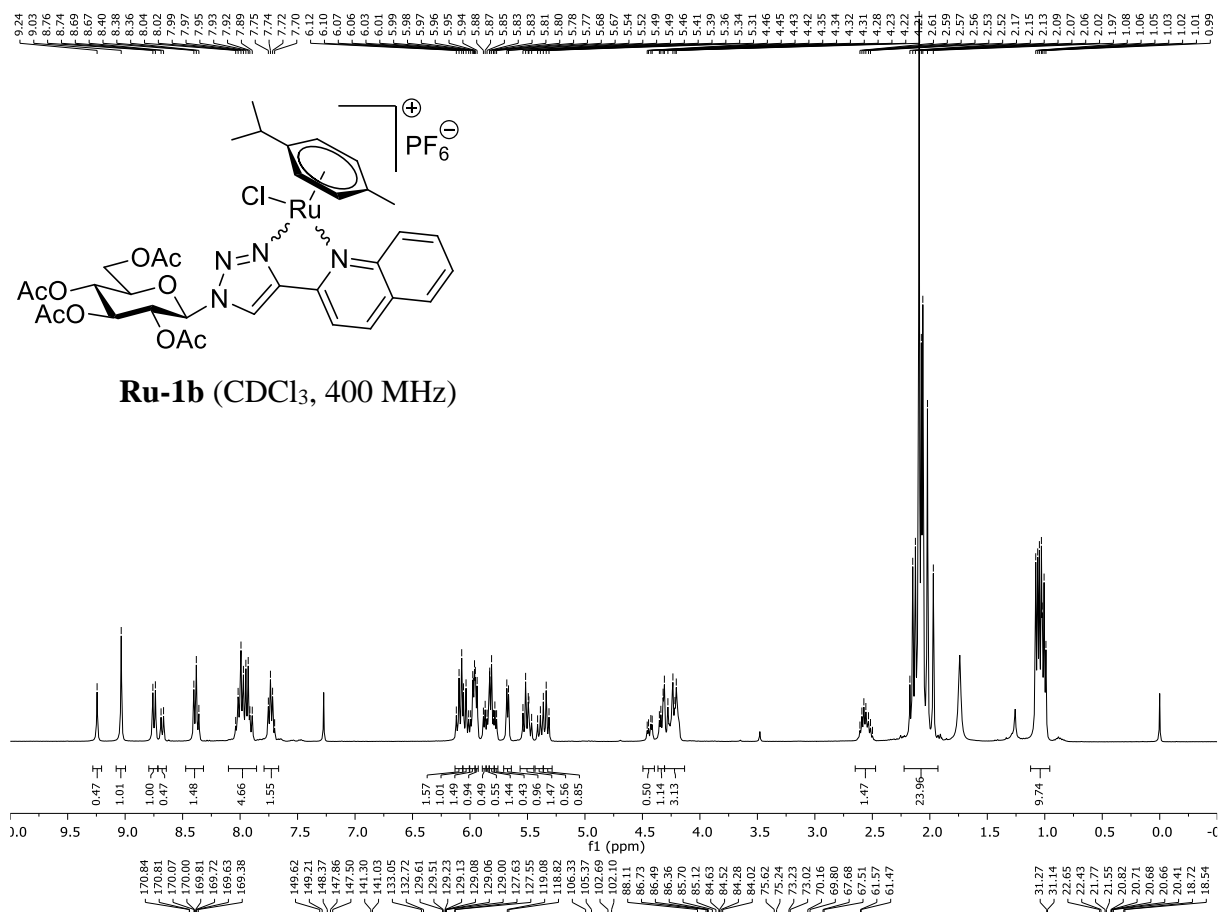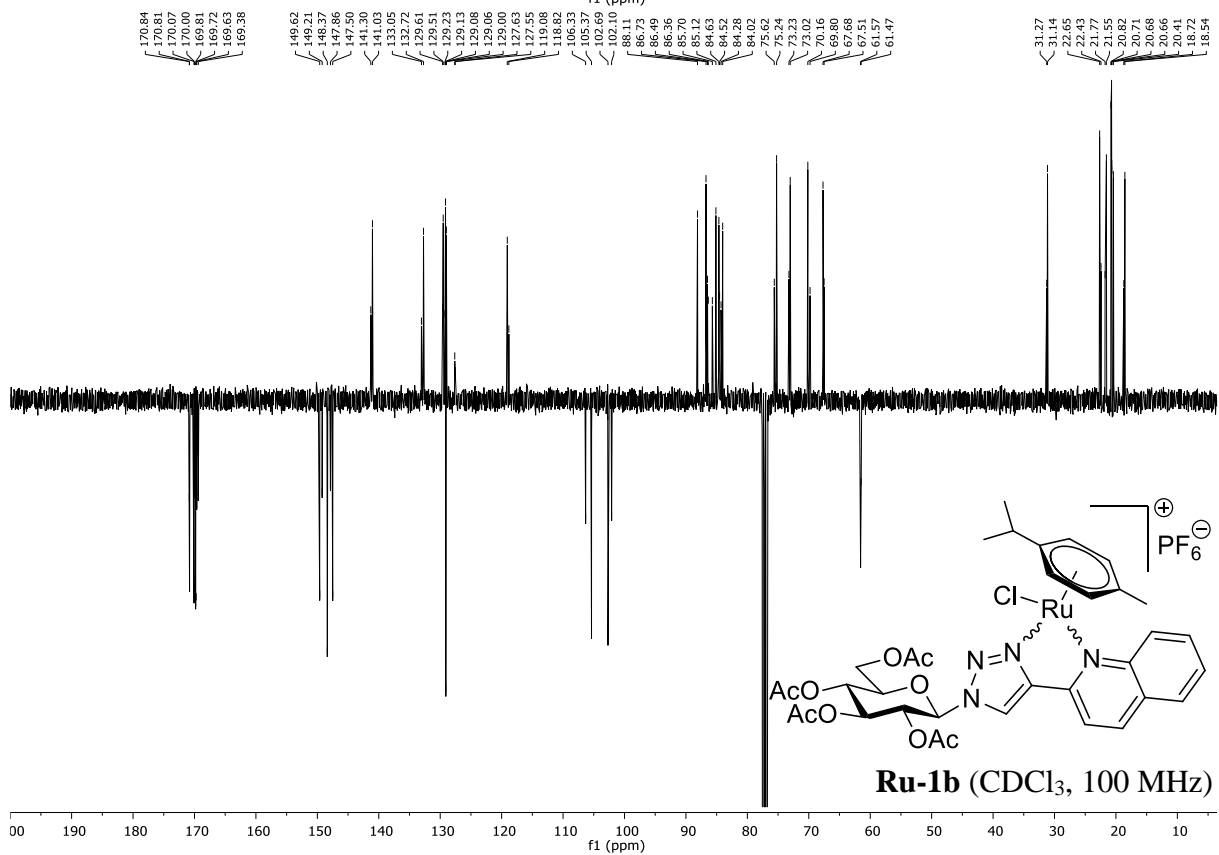

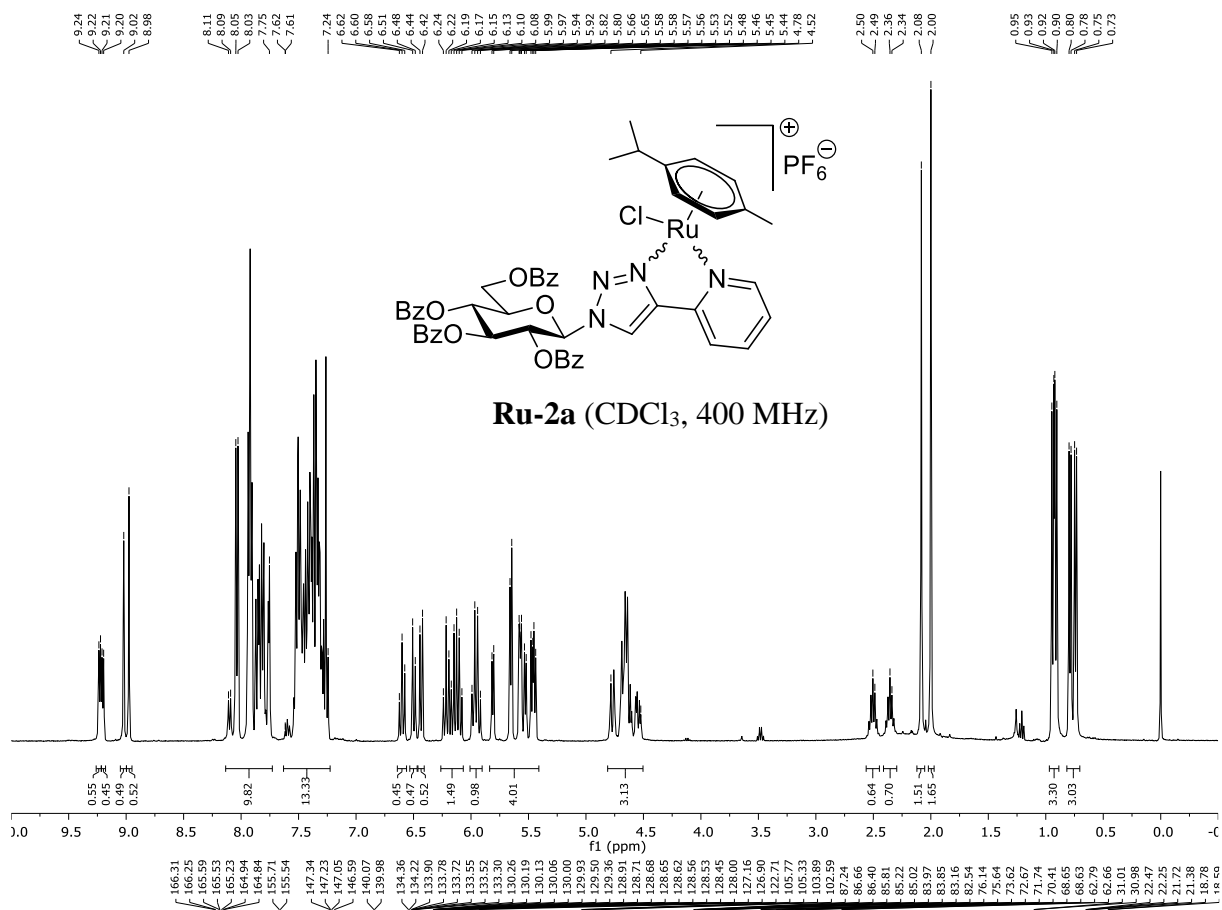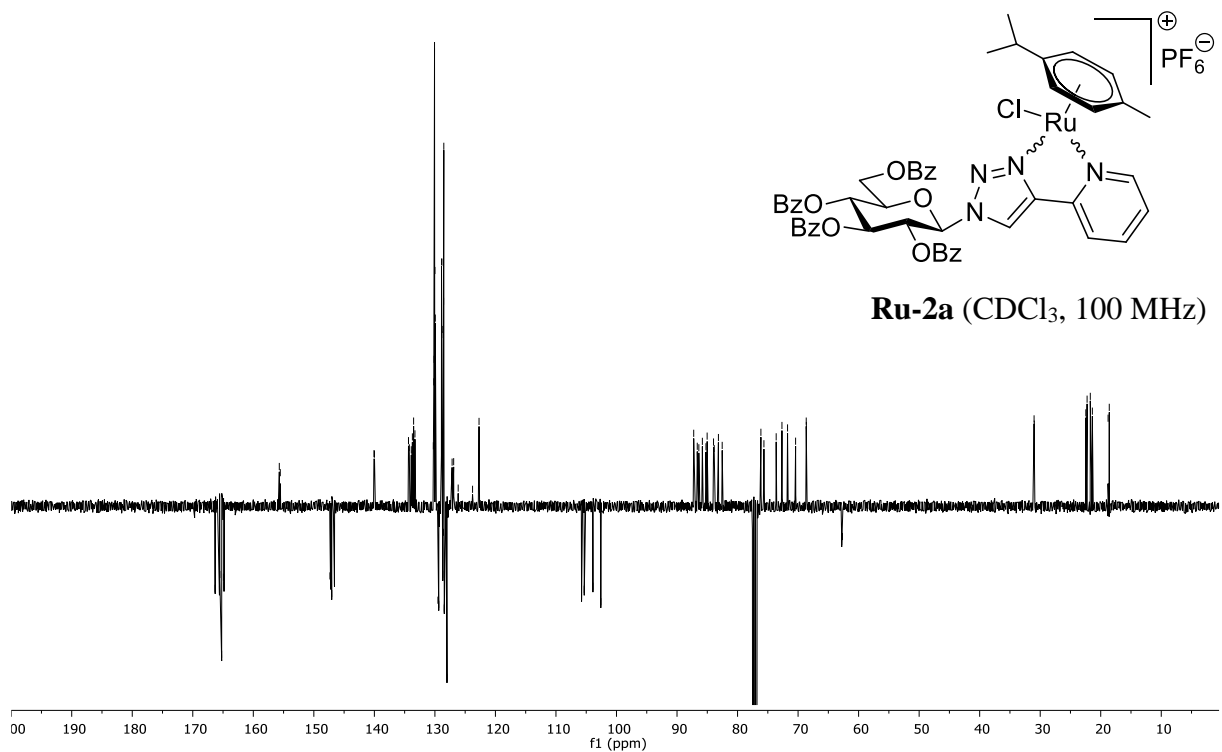

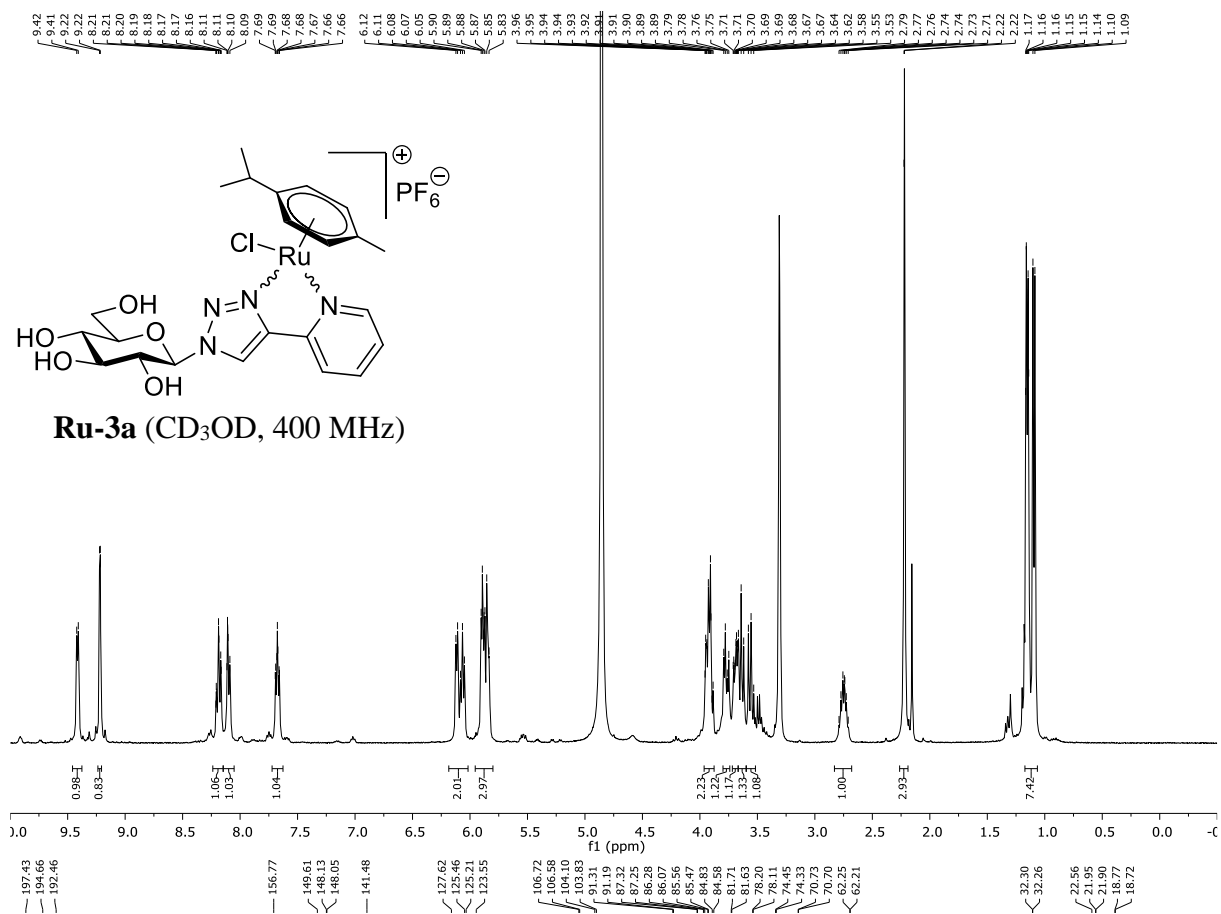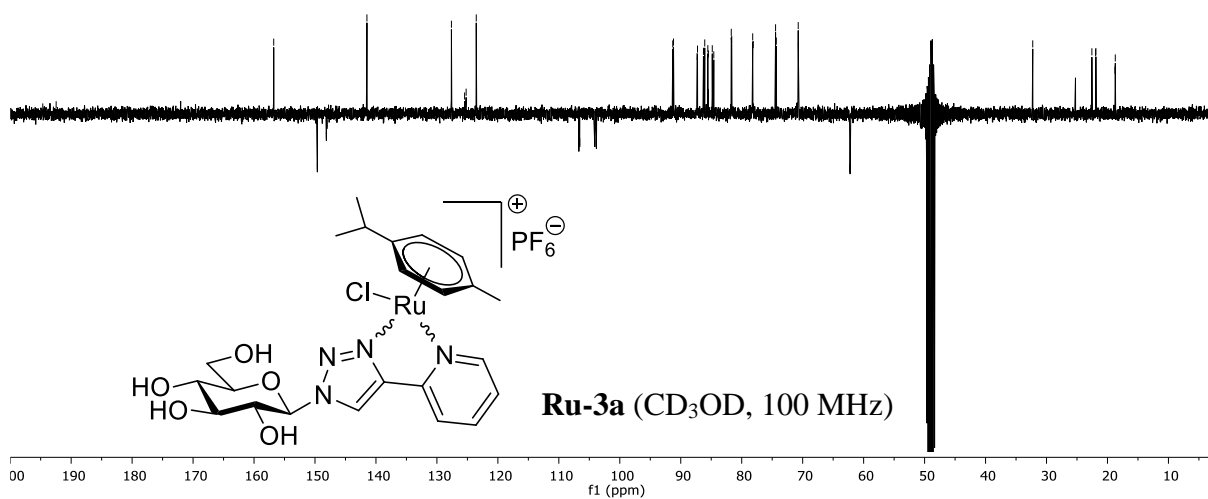



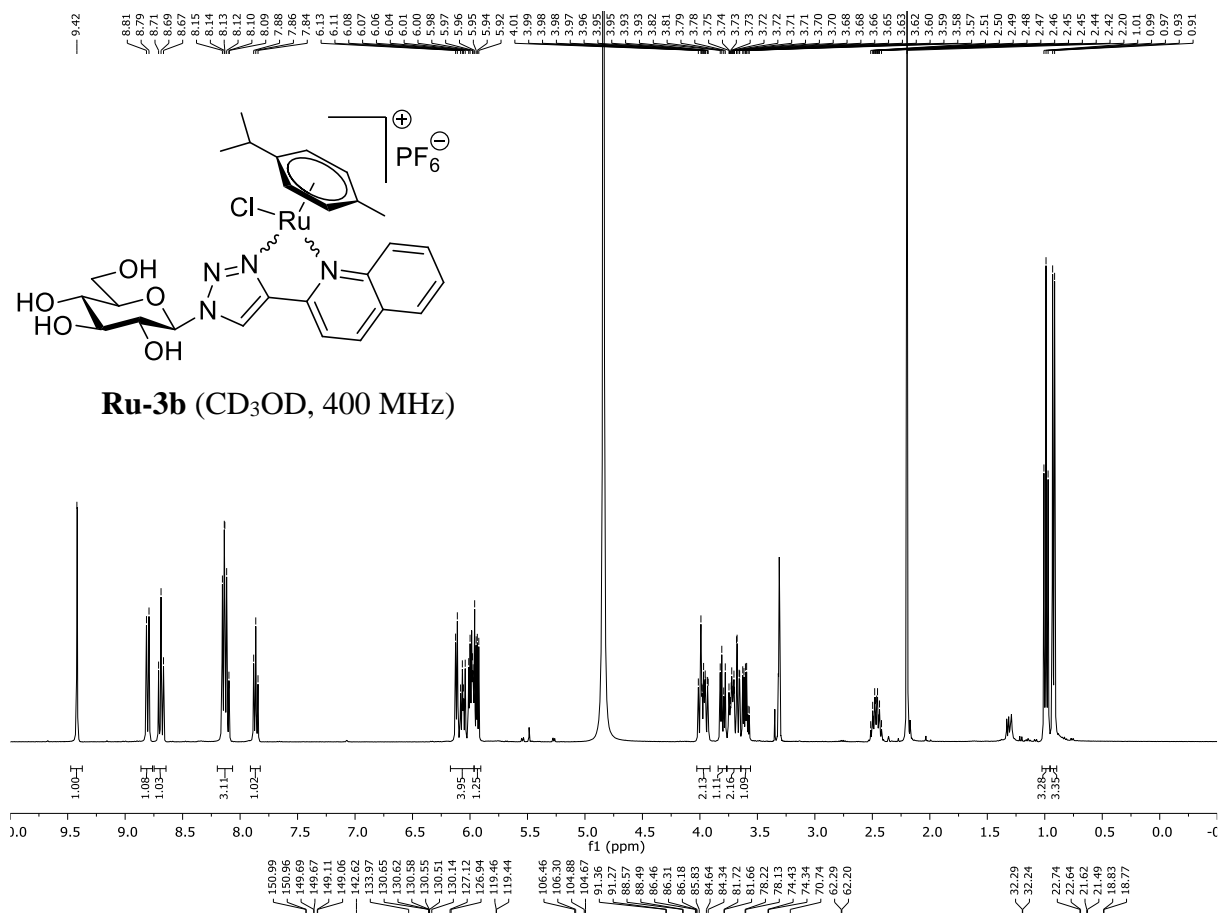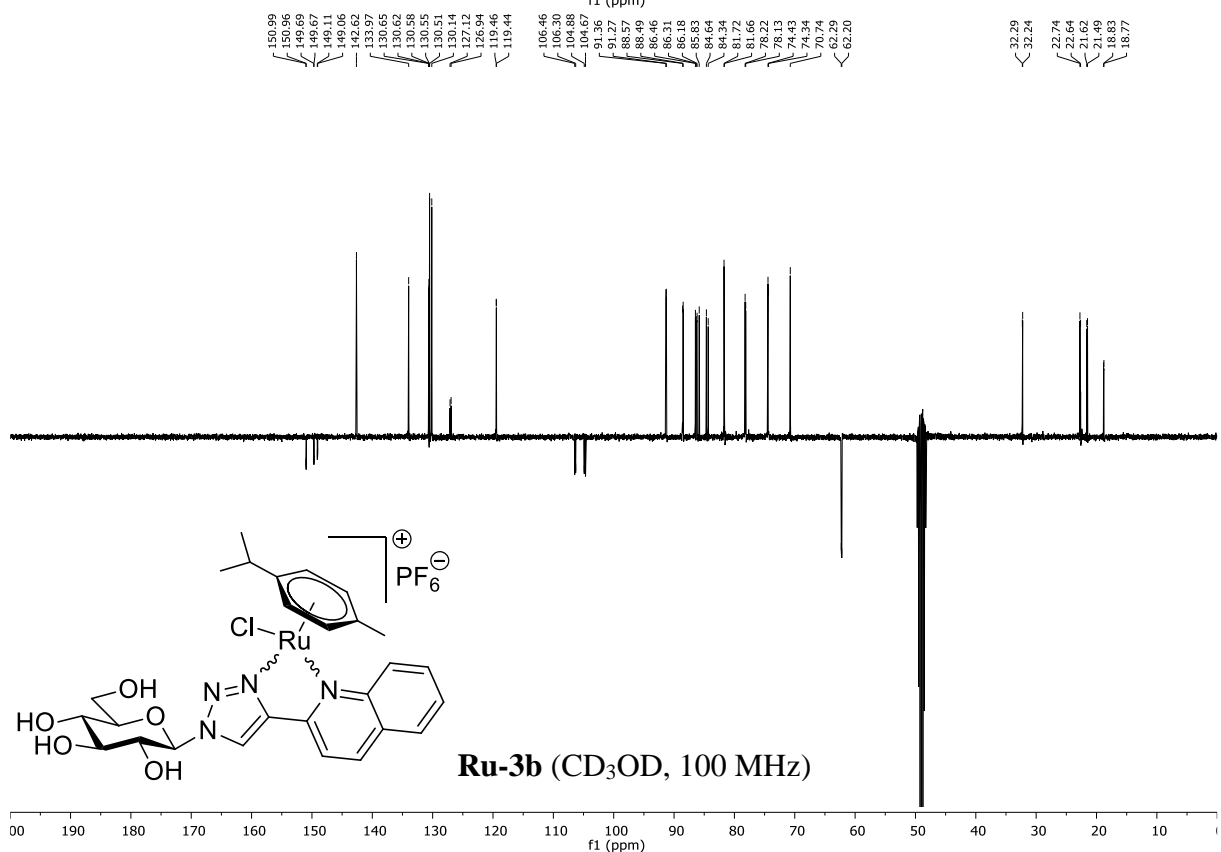

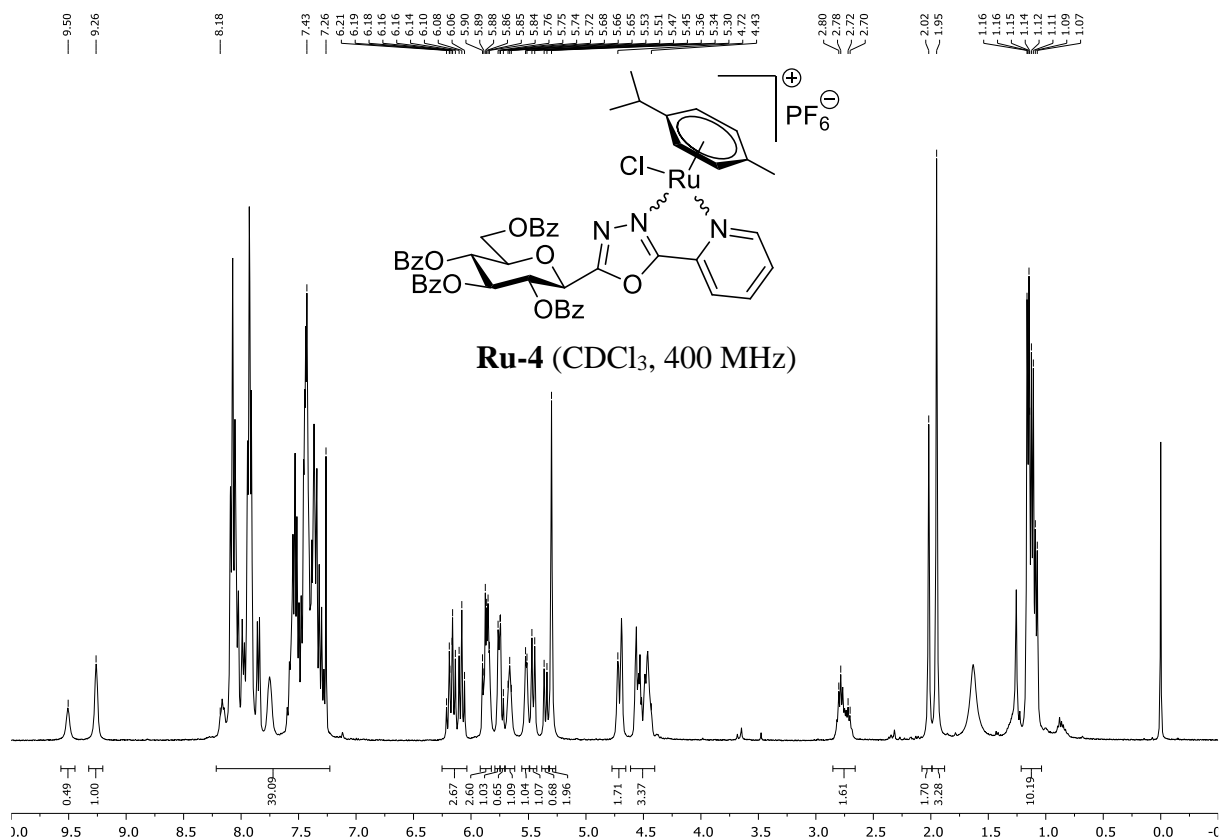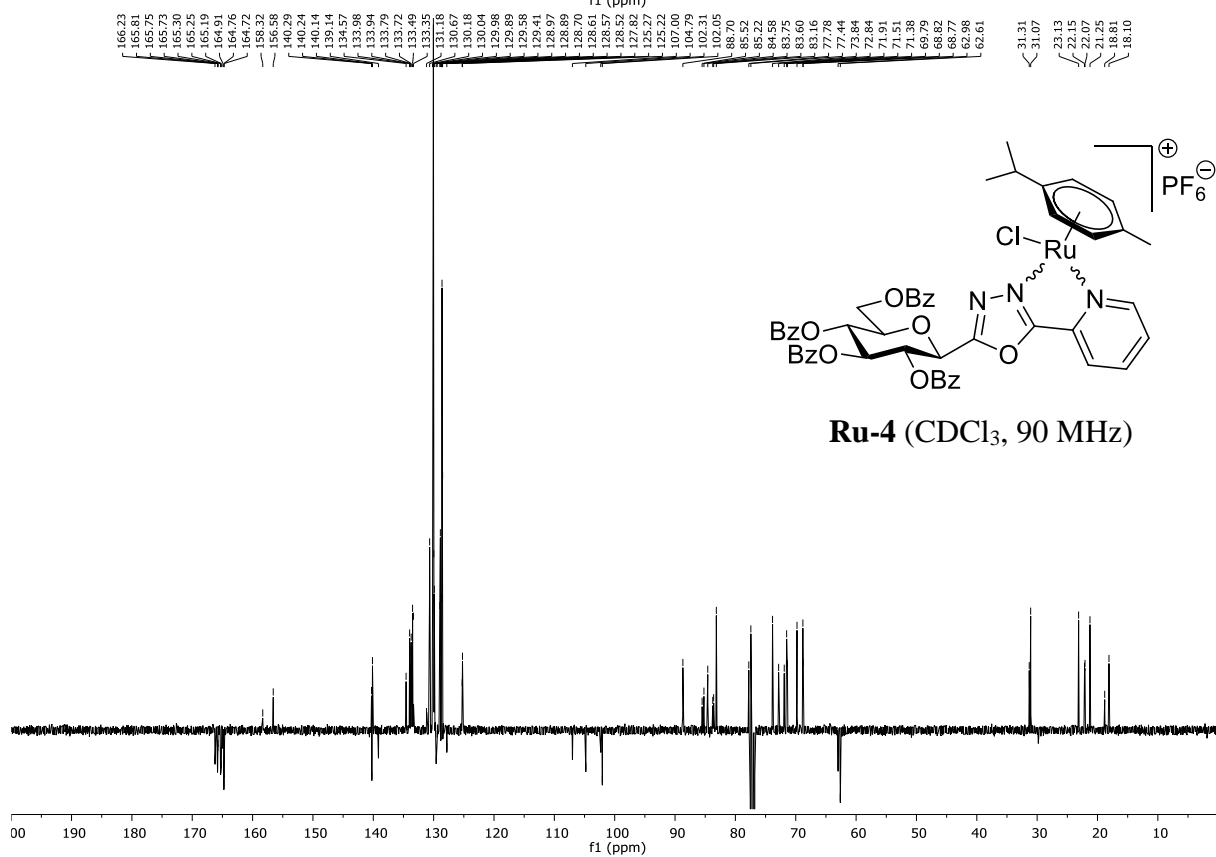

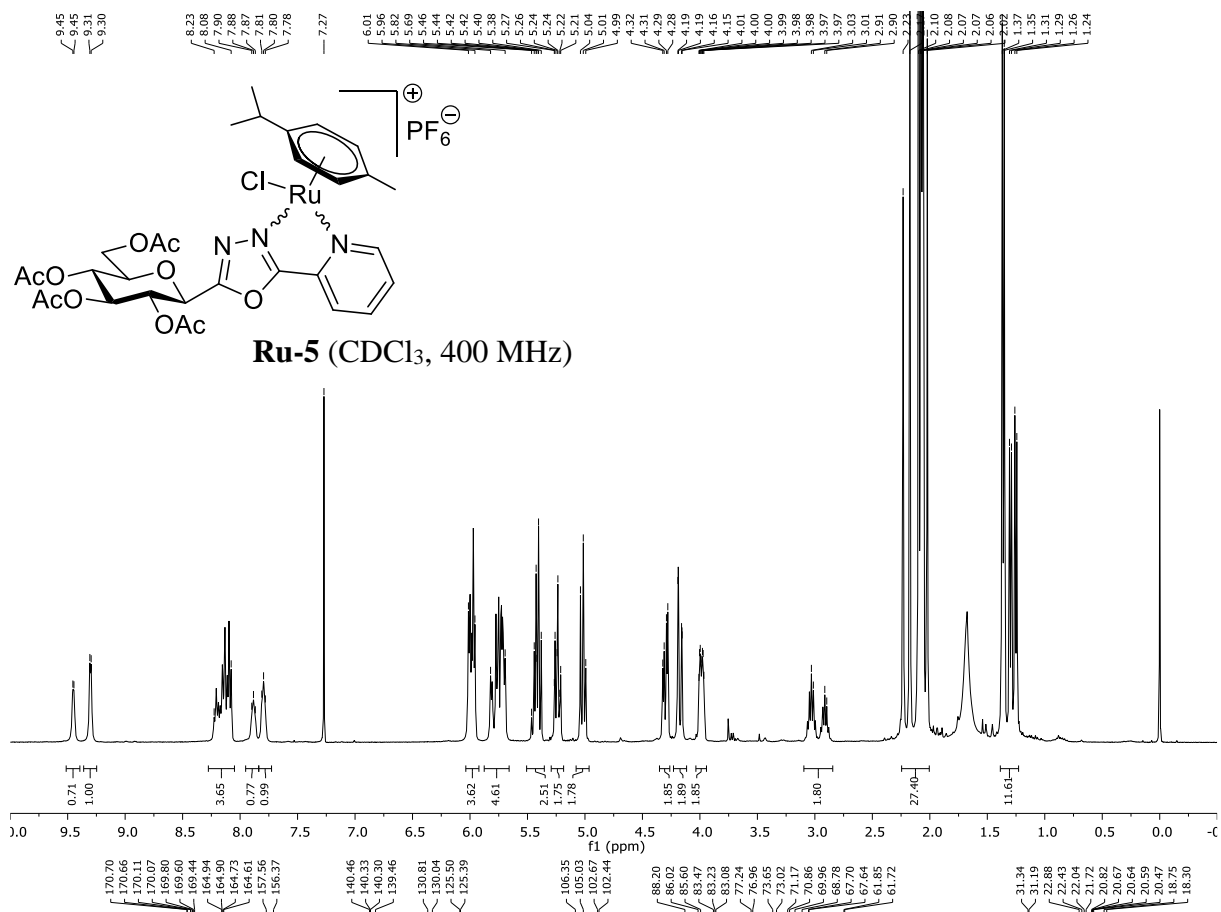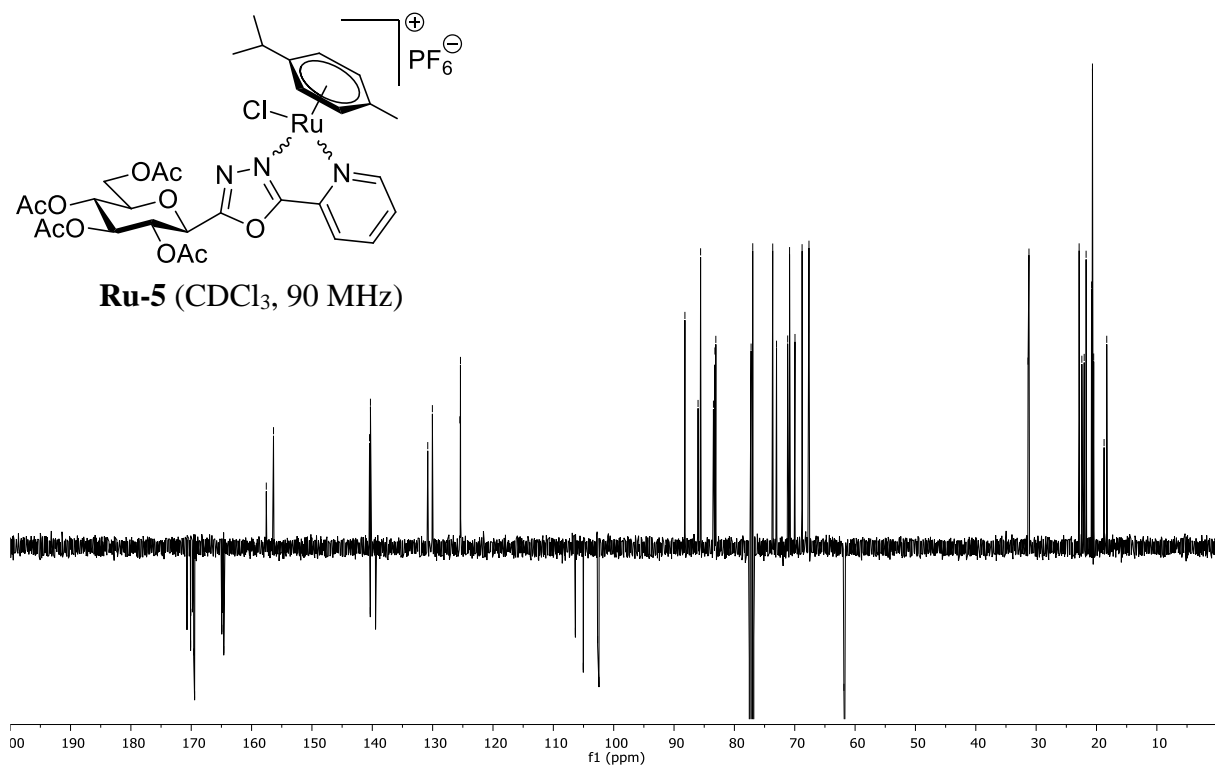

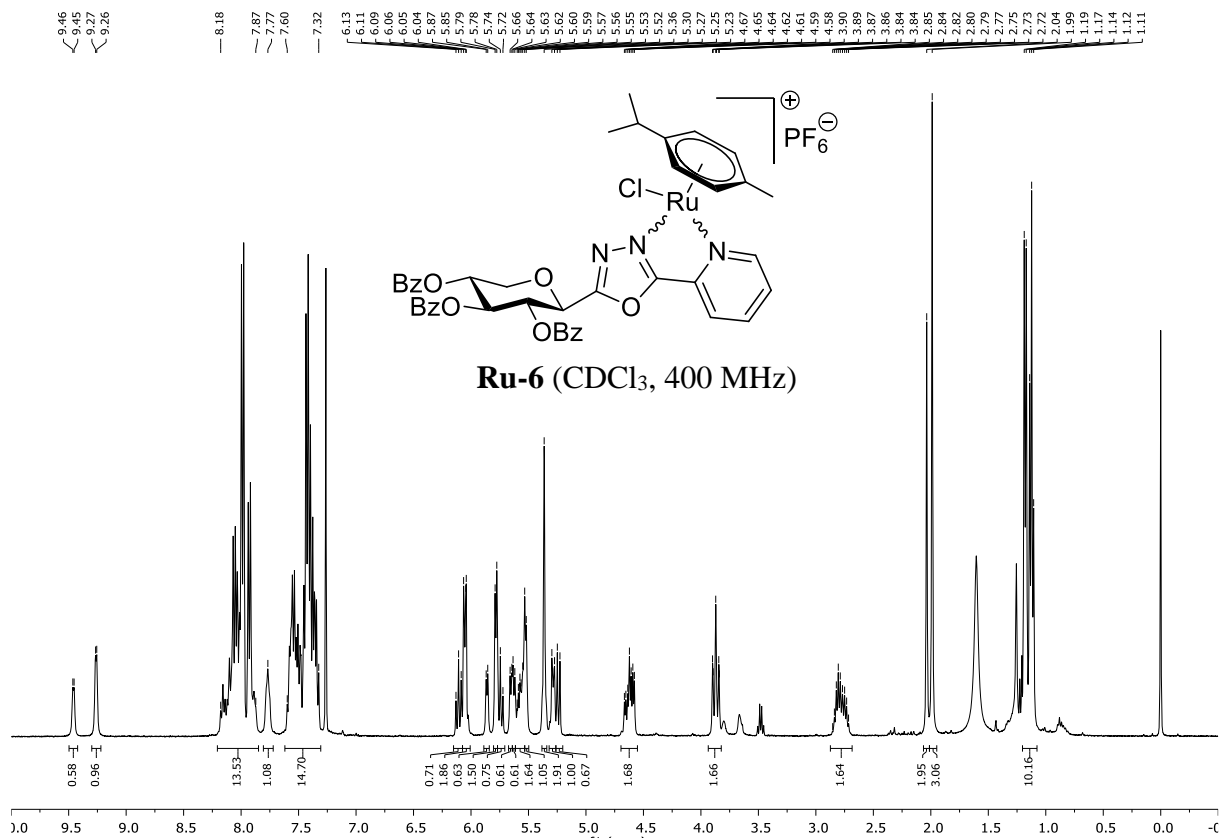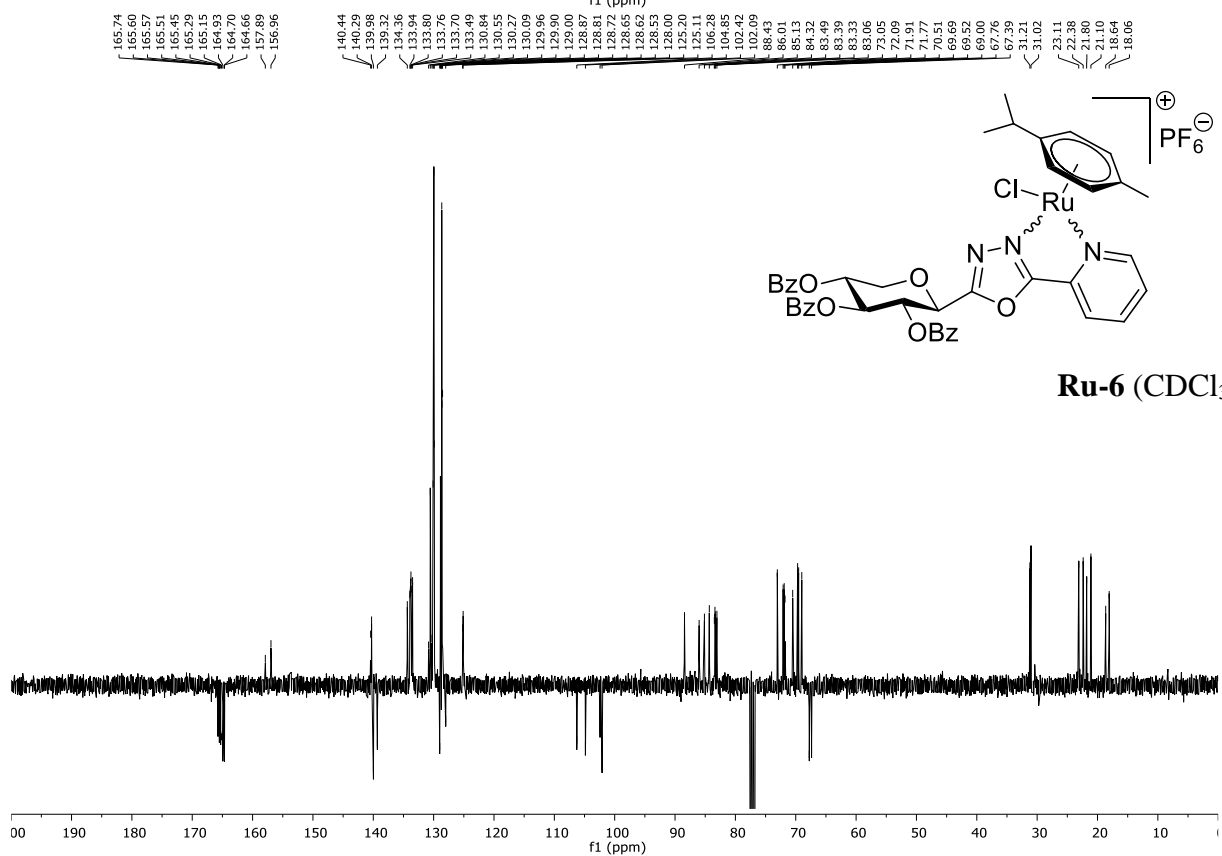

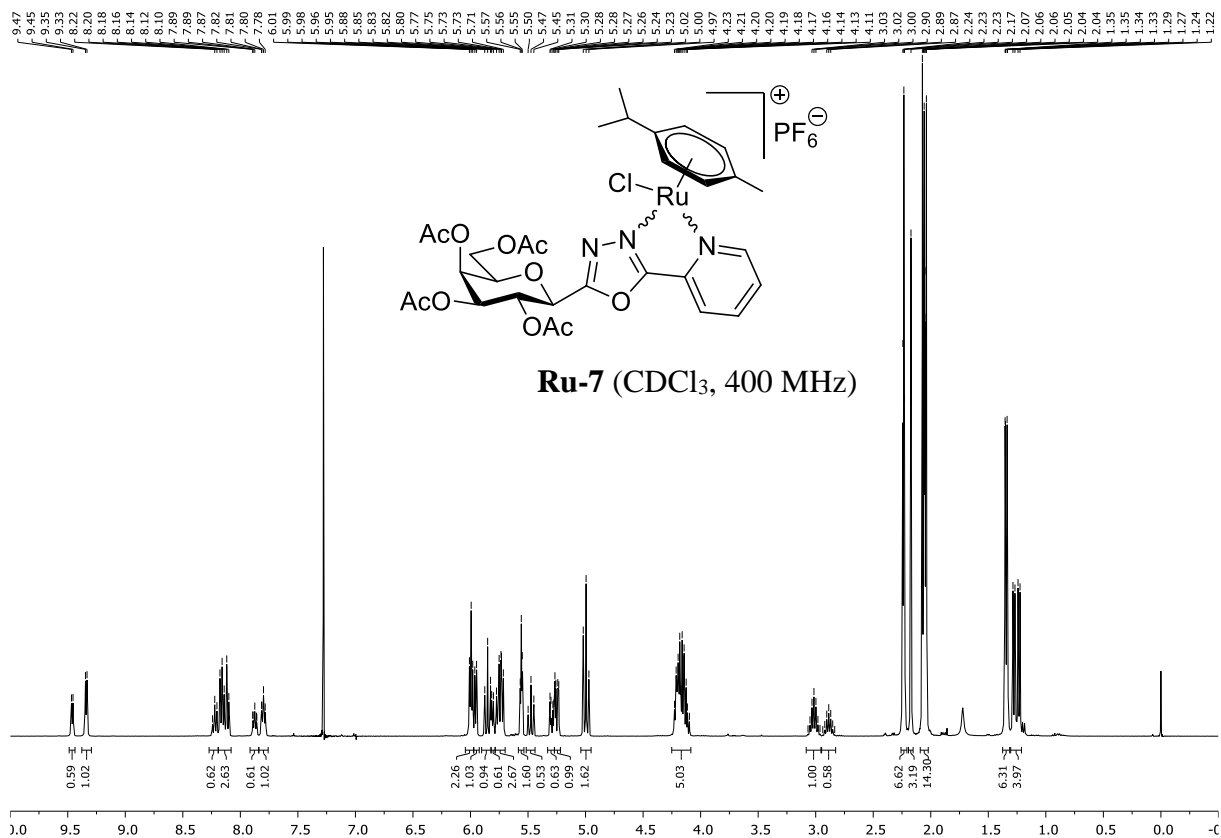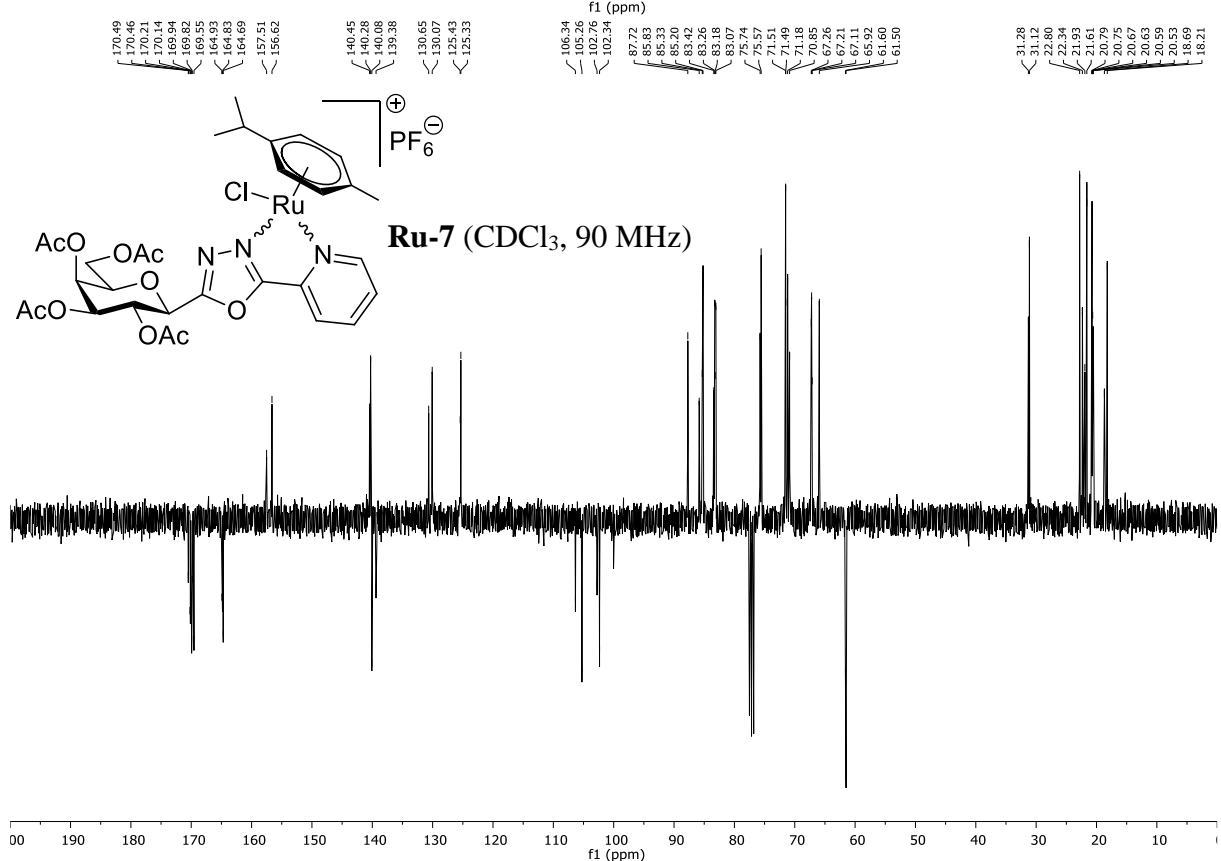

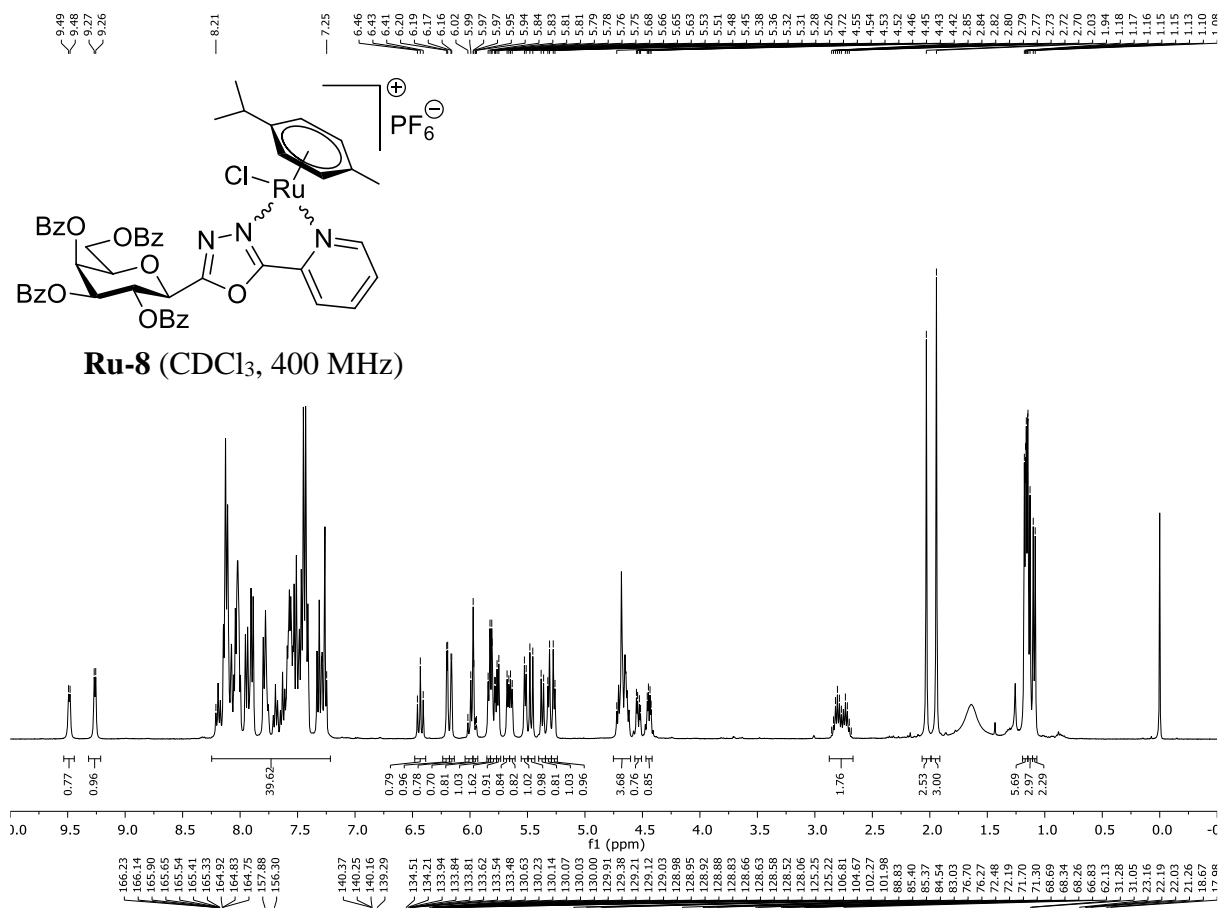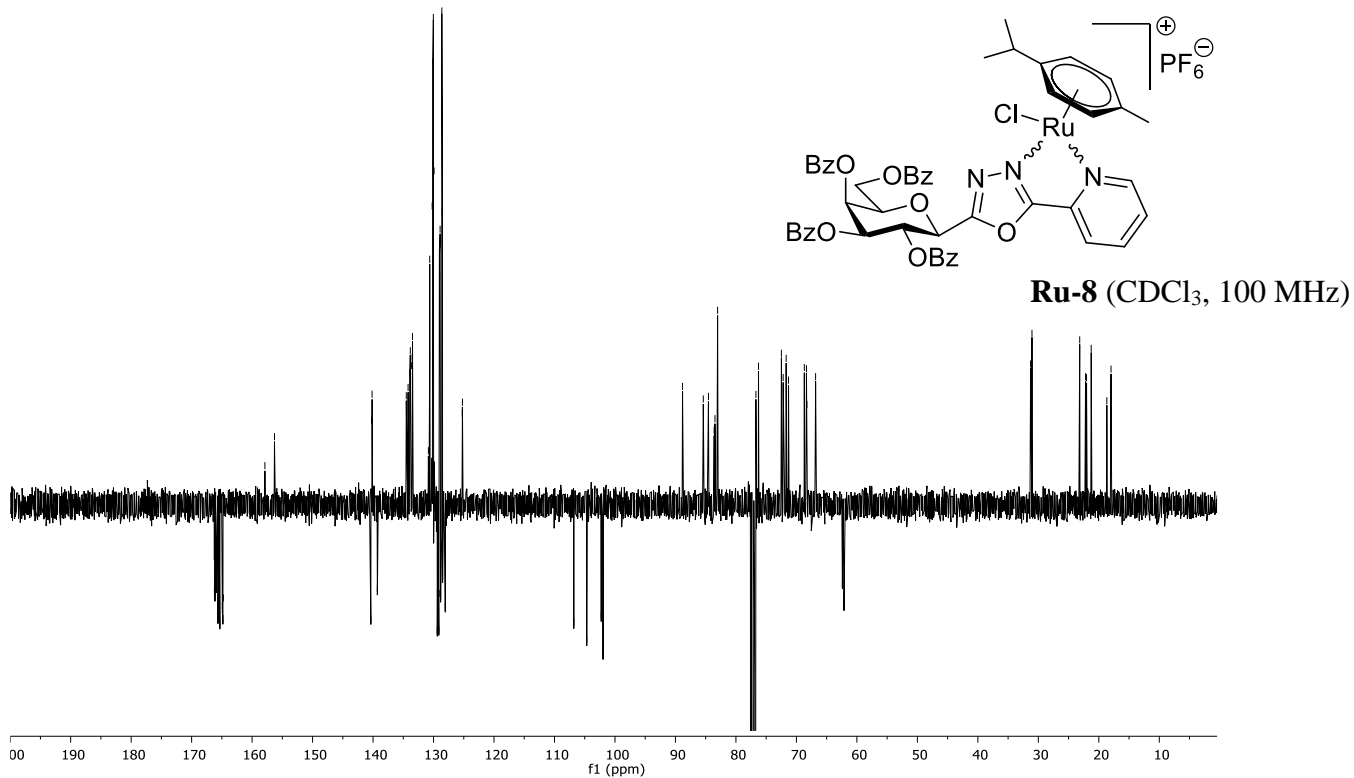



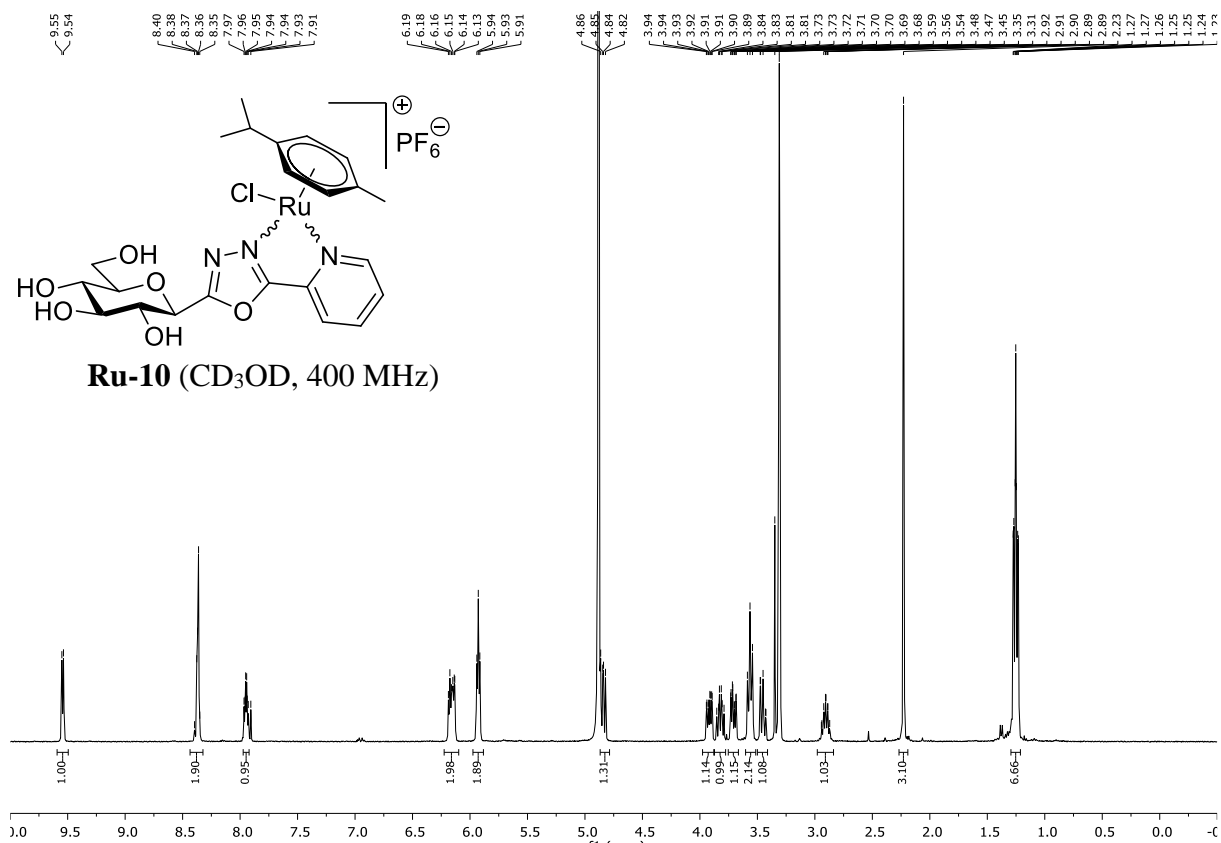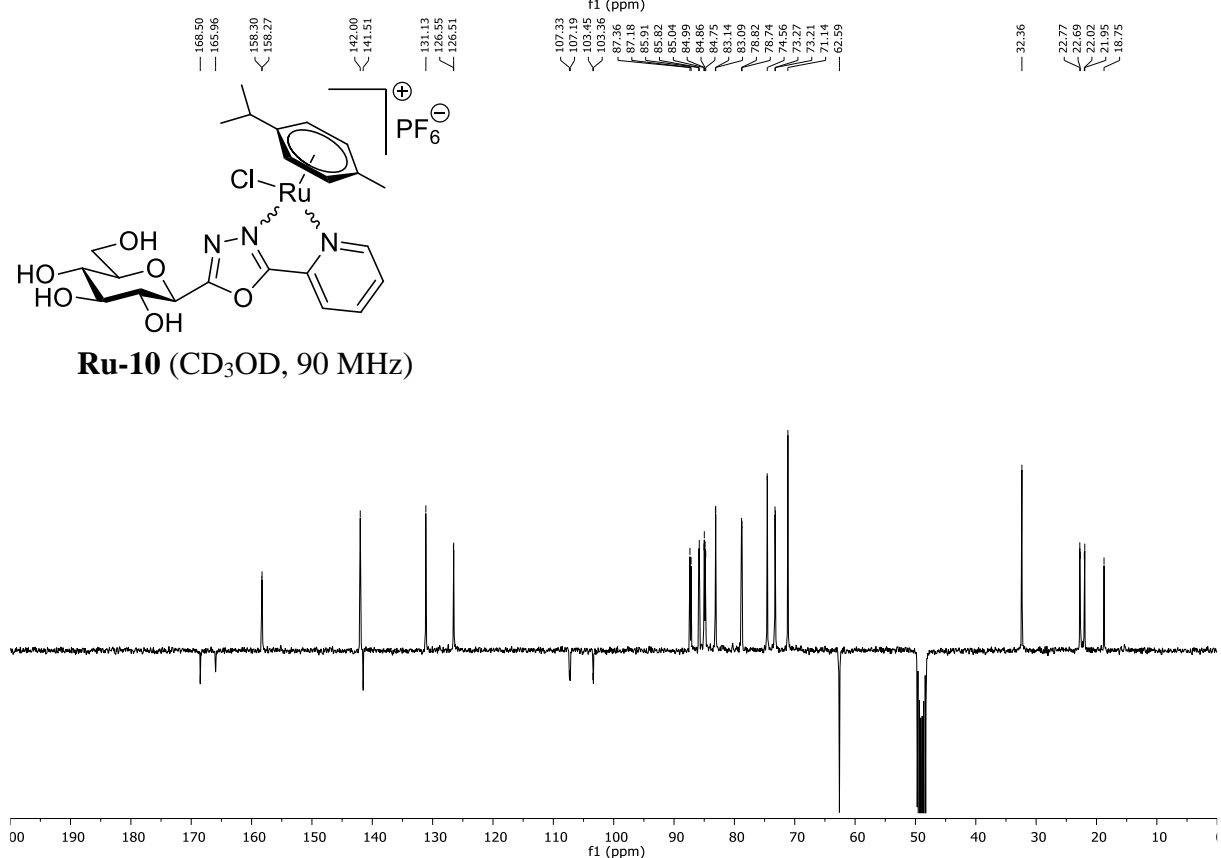



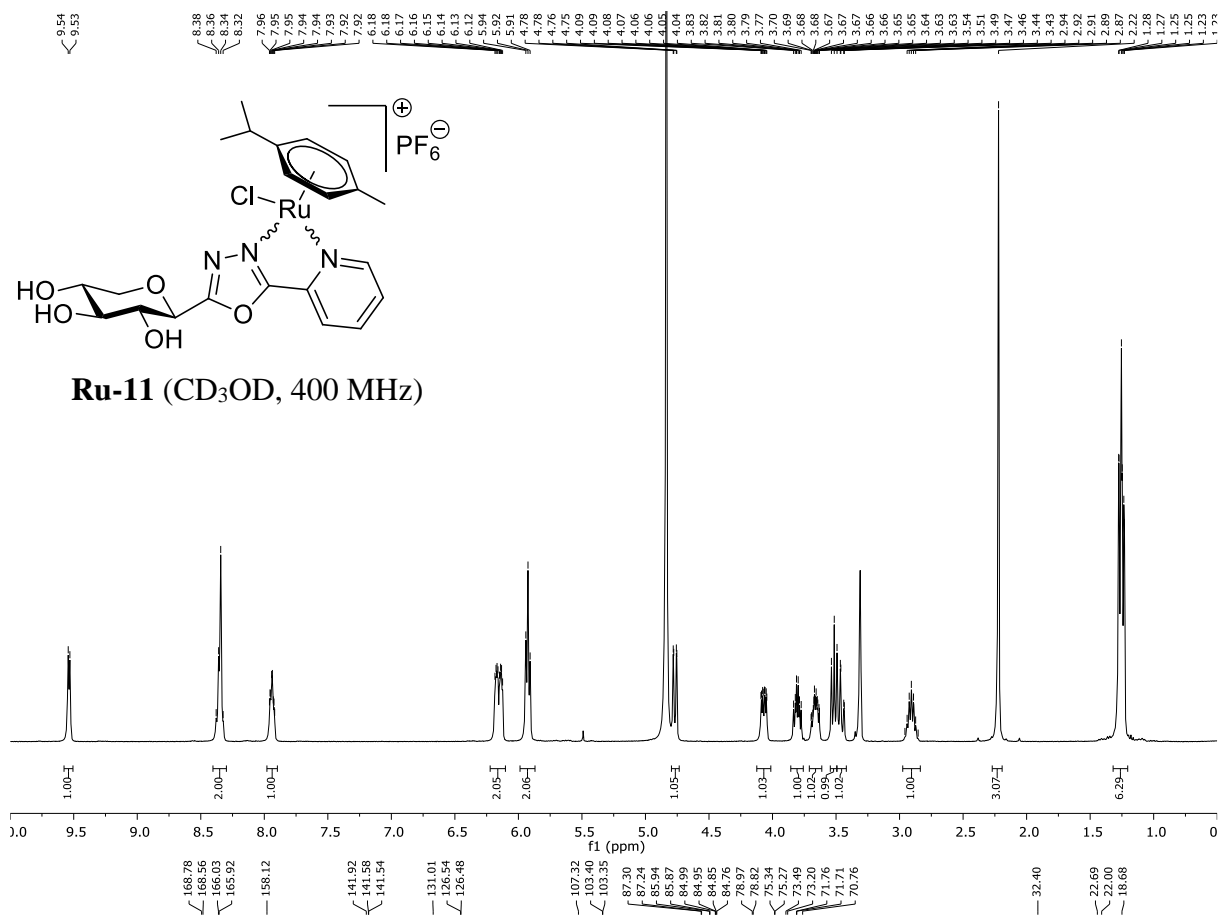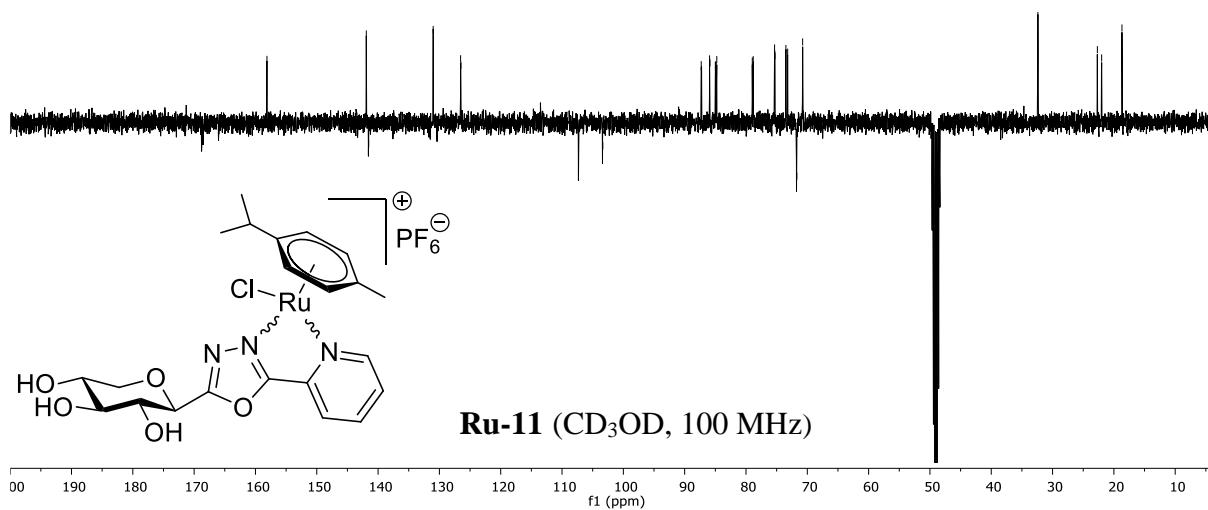

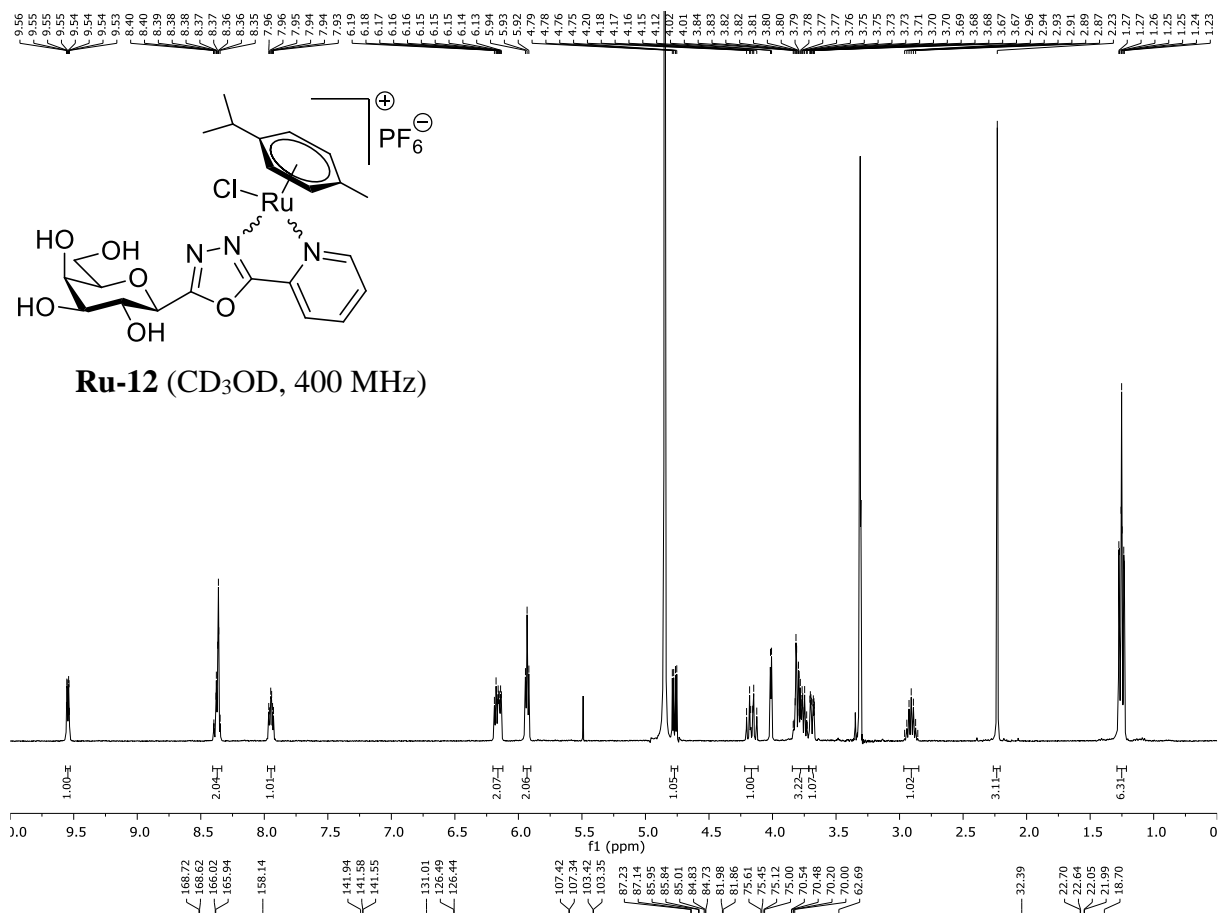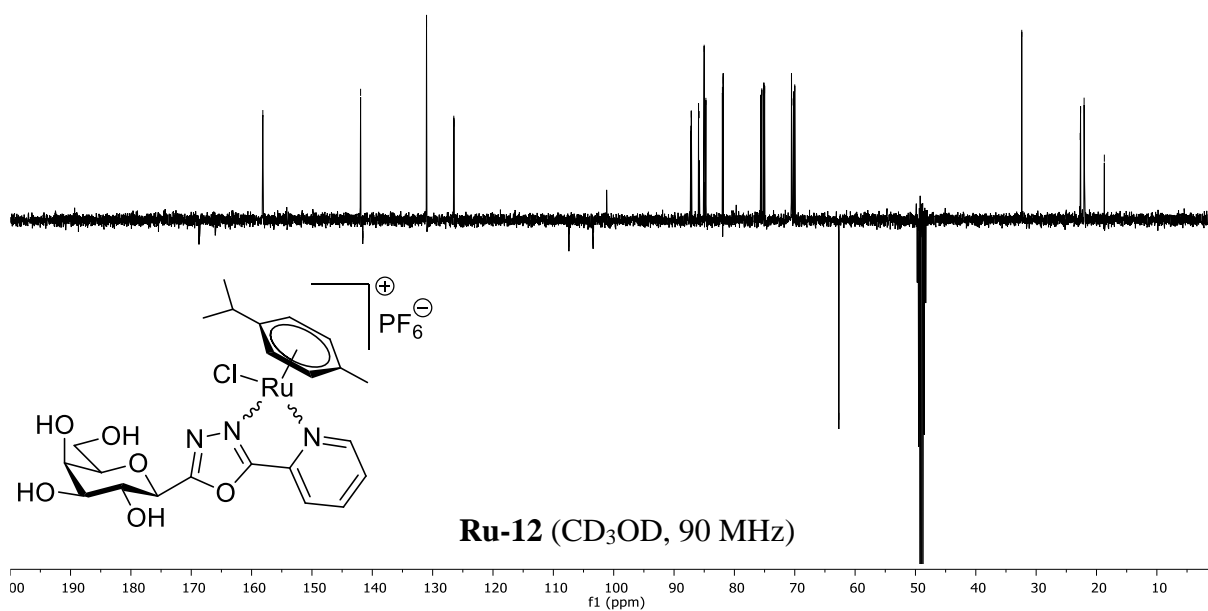

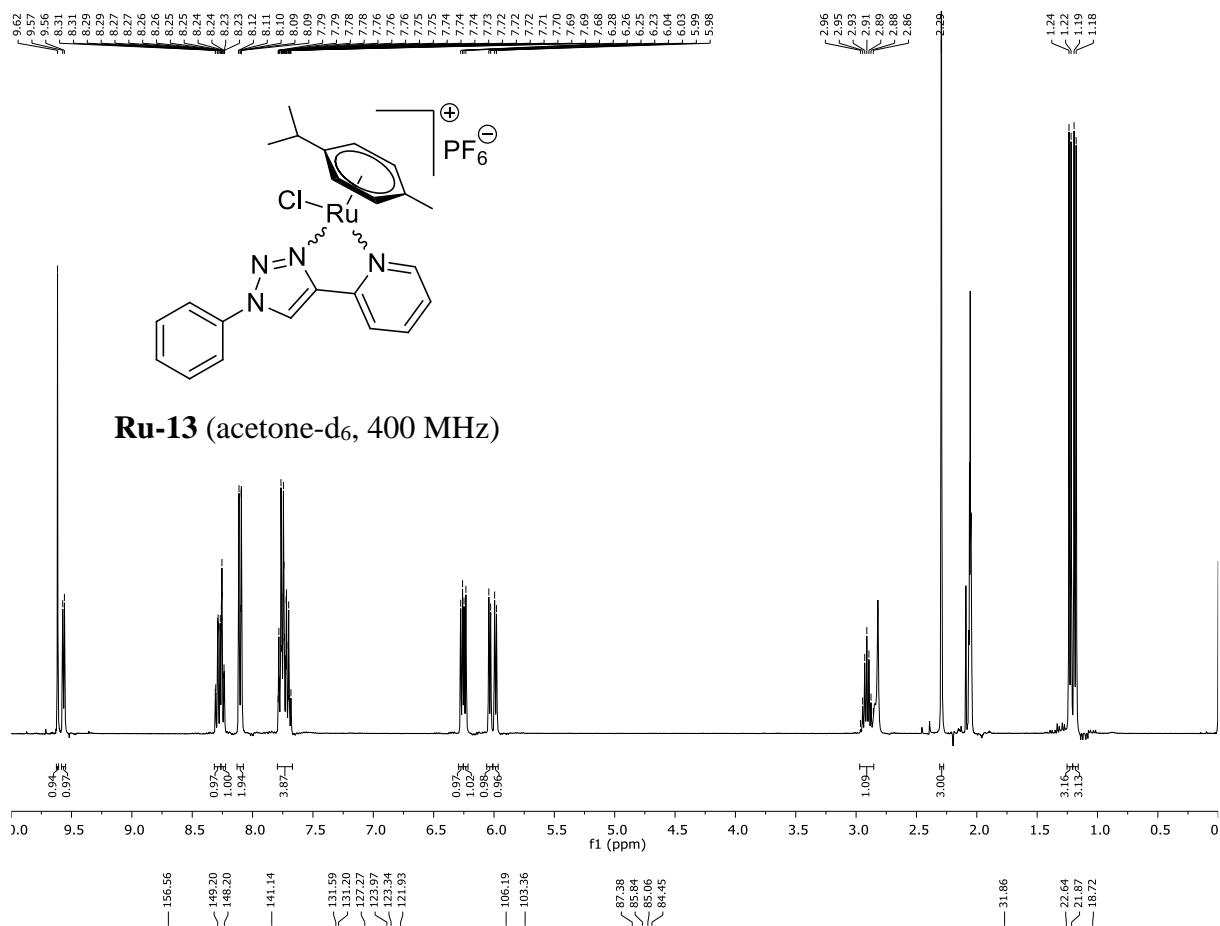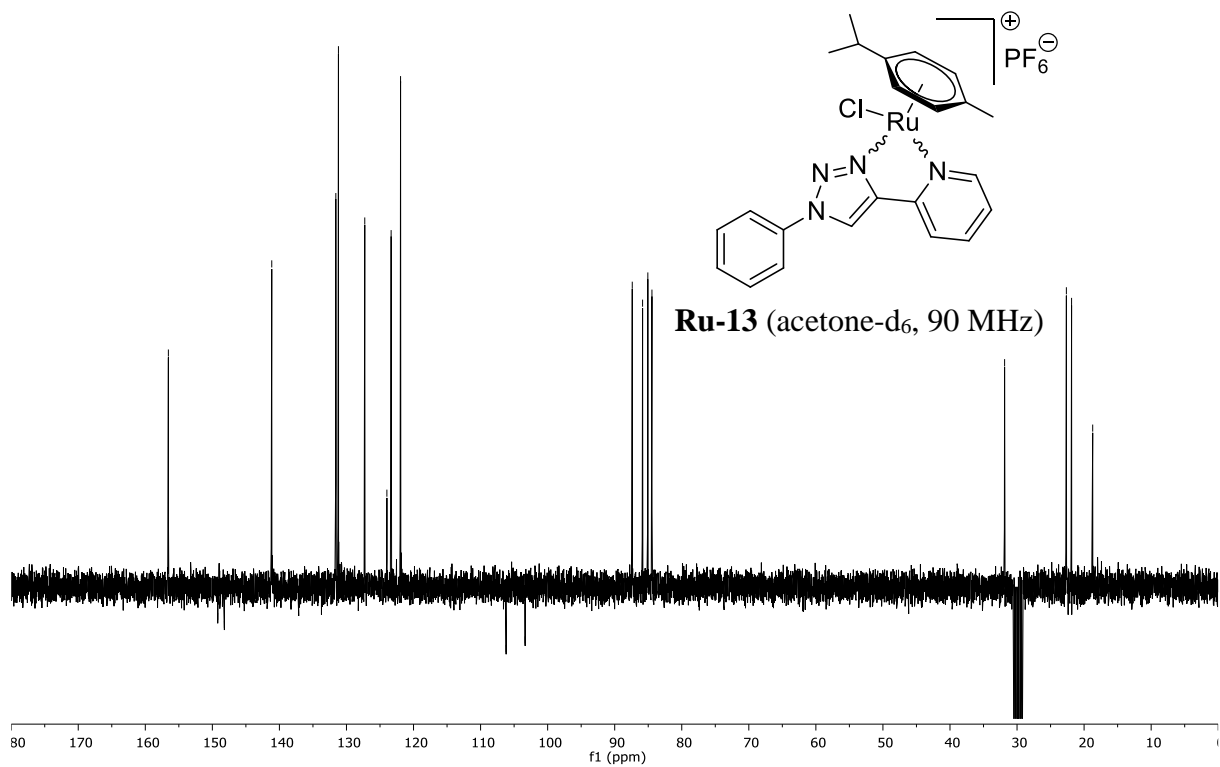



### 3. A representative example for the stability of the complexes in aqueous medium

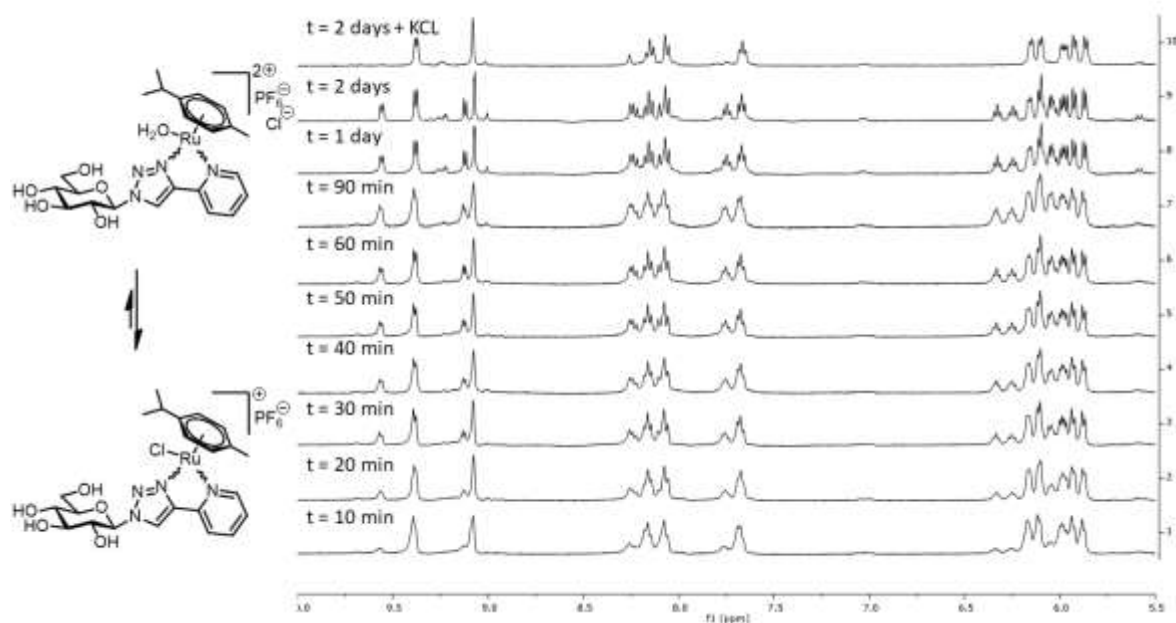

**Figure S1.** Time dependence of the  $^1\text{H}$  NMR spectra of **Ru-3a** in  $\text{D}_2\text{O}$  over a 2 day period. By the addition of KCl (100 eq.) the original spectrum could be recovered indicating only  $\text{Cl}^-/\text{D}_2\text{O}$  exchange during the period of time of the study.

**4. Table S9.** Distribution coefficient of the synthesized complexes (logD)

| Complex                                                                                             | LogD  | Complex                                                                                              | logD  |
|-----------------------------------------------------------------------------------------------------|-------|------------------------------------------------------------------------------------------------------|-------|
| <b>Ru-1a</b><br>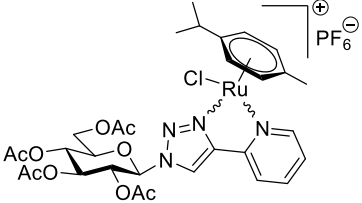   | -1.09 | <b>Ru-7</b><br>    | -1.29 |
| <b>Ru-1b</b><br>   | -0.97 | <b>Ru-8</b><br>    | 2.44  |
| <b>Ru-2a</b><br>   | 2.85  | <b>Ru-9</b><br>    | -1.35 |
| <b>Ru-3a</b><br>  | -1.85 | <b>Ru-10</b><br>  | -1.93 |
| <b>Ru-3b</b><br> | -1.30 | <b>Ru-11</b><br> | -1.73 |
| <b>Ru-4</b><br>  | 2.41  | <b>Ru-12</b><br> | -1.73 |
| <b>Ru-5</b><br>  | -1.80 | <b>Ru-13</b><br> | 0.44  |
| <b>Ru-6</b><br>  | 2.04  | <b>Ru-14</b><br> | 1.63  |
